# Supplementary material for: Dynamic inosinome profiles reveal novel patient stratification and gender-specific differences in glioblastoma
Source: Genome Biol. 2019 Feb 13;20:33. doi: 10.1186/s13059-019-1647-x (PMC6373152; doi:10.1186/s13059-019-1647-x)
Supplement: Supplementary file 7 — Tables S6. Gene expression analysis of INO-1 and INO-2 GBM subgroups. In the first sheet are reported values of all patients and in the second sheet are shown the female values. (XLSX 83 kb) [file 13059_2019_1647_MOESM7_ESM.xlsx]

## Sheet: FPKM_INO-1 vs INO-2
Table S6. Gene expression analysis of INO-1 and INO-2 GBM subgroups. Differential expression between INO-1 and INO-2 editing-based subgroups was tested with CuffDiff2 software version 2.2.1.
gene	locus	INO-1 (FPKM) mean	INO-2 (FPKM) mean	log2 INO2/INO1 (fold_change)	test-stat	p-value	q-value	significant
CXCL17	19:42901279-43156507	0.603611	0.00715352	-6.39882	-0.118113	5e-05	0.00190212	yes
EPYC	12:91357455-91398803	1.59721	0.0416163	-5.26226	-0.460371	5e-05	0.00190212	yes
LINC01445	7:54398389-54417538	36.8876	1.70698	-4.43362	-0.463452	5e-05	0.00190212	yes
HCRT	17:40336077-40337470	1.68147	0.13561	-3.63219	-0.569478	5e-05	0.00190212	yes
SDR9C7	12:57316937-57328189	0.426482	0.0390543	-3.44893	-0.38958	5e-05	0.00190212	yes
DNAH8	6:38683116-38998574	0.319872	0.0294571	-3.44081	-0.356528	5e-05	0.00190212	yes
SEPT14	7:55861236-55930482	13.5962	1.42629	-3.25287	-0.286085	5e-05	0.00190212	yes
DAO	12:109273856-109294710	1.53119	0.179633	-3.09153	-0.43814	5e-05	0.00190212	yes
KLHDC7A	1:18807423-18812480	0.550819	0.0681632	-3.01451	-0.481009	5e-05	0.00190212	yes
KISS1	1:204159468-204165619	4.1368	0.53025	-2.96377	-0.381652	5e-05	0.00190212	yes
TRDN	6:123537483-123958238	0.860917	0.112426	-2.9369	-0.48048	5e-05	0.00190212	yes
SFRP5	10:99526507-99531756	4.56767	0.767219	-2.57375	-0.389839	5e-05	0.00190212	yes
CAPSL	5:35904397-35938881	1.65273	0.280294	-2.55984	-0.394843	5e-05	0.00190212	yes
DEFB1	8:6728096-6735529	0.439453	0.0749161	-2.55236	-0.305181	5e-05	0.00190212	yes
CLC	19:40221892-40228669	0.391562	0.0742512	-2.39876	-0.231027	5e-05	0.00190212	yes
STAP1	4:68424414-68473059	0.317141	0.0603275	-2.39424	-0.399961	5e-05	0.00190212	yes
C9orf24	9:34379016-34397849	18.737	3.5868	-2.38512	-0.703116	5e-05	0.00190212	yes
MMP13	11:102813720-102826463	5.67007	1.19106	-2.25112	-0.243105	5e-05	0.00190212	yes
RSAD2	2:7017795-7038363	14.9818	3.16044	-2.24502	-1.12631	5e-05	0.00190212	yes
FAM81B	5:94727047-94786144	1.36523	0.288952	-2.24024	-0.440267	5e-05	0.00190212	yes
ZBP1	20:56178901-56195632	0.968847	0.216251	-2.16356	-0.492903	5e-05	0.00190212	yes
CYP4F3	19:15751706-15771570	0.80506	0.182739	-2.13931	-0.463513	5e-05	0.00190212	yes
MAPK15	8:144798506-144804633	0.906765	0.21212	-2.09585	-0.393163	5e-05	0.00190212	yes
CXCR2P1	2:218899656-218955304	0.710792	0.167498	-2.08528	-0.360039	5e-05	0.00190212	yes
IFI44L	1:79086066-79111830	26.9616	6.3668	-2.08227	-1.10475	5e-05	0.00190212	yes
C11orf88	11:111385509-111407756	2.73427	0.657899	-2.05522	-0.355854	5e-05	0.00190212	yes
APOH	17:64208146-64225556	0.351216	0.0856261	-2.03624	-0.232968	5e-05	0.00190212	yes
NRIR	2:6968684-6980595	0.530584	0.130416	-2.02446	-0.350123	5e-05	0.00190212	yes
SLC7A3	X:70145429-70150975	5.72688	1.44694	-1.98474	-0.568557	5e-05	0.00190212	yes
LINC01532	19:29493461-29504862	1.40228	0.363113	-1.94929	-0.407995	5e-05	0.00190212	yes
FAM183A	1:43613593-43622067	7.25094	1.88926	-1.94034	-0.446583	5e-05	0.00190212	yes
PCK1	20:56136136-56141513	0.320417	0.0839491	-1.93236	-0.272935	5e-05	0.00190212	yes
SLC14A1	18:43304087-43332485	11.8095	3.12936	-1.916	-0.693746	5e-05	0.00190212	yes
COMP	19:18893582-18902114	0.959146	0.254975	-1.9114	-0.233549	5e-05	0.00190212	yes
IFIT1	10:91152302-91166244	22.2978	6.01787	-1.88957	-1.04853	5e-05	0.00190212	yes
CAMP	3:48264836-48266981	2.02728	0.547184	-1.88945	-0.304511	5e-05	0.00190212	yes
TFF3	21:43731776-43735706	1.20015	0.325311	-1.88333	-0.304467	5e-05	0.00190212	yes
OASL	12:121458094-121477045	7.19584	1.95365	-1.88099	-0.805395	5e-05	0.00190212	yes
SCGB1D2	11:62009723-62012280	3.88392	1.06736	-1.86347	-0.37152	5e-05	0.00190212	yes
LINC02574	1:27986838-27989233	1.2579	0.351076	-1.84117	-0.345787	5e-05	0.00190212	yes
KRT16	17:39766030-39769079	0.593847	0.16614	-1.83769	-0.270506	5e-05	0.00190212	yes
MX1	21:42792484-42831141	71.933	20.607	-1.80352	-0.878958	5e-05	0.00190212	yes
C1orf189	1:154171561-154178841	1.11626	0.320214	-1.80156	-0.300143	5e-05	0.00190212	yes
CYP4F12	19:15783827-15807984	1.22533	0.352002	-1.79951	-0.379556	5e-05	0.00190212	yes
MAP3K19	2:135722060-135782248	0.961736	0.277549	-1.7929	-0.401931	5e-05	0.00190212	yes
SBSPON	8:73976777-74005507	3.49177	1.01314	-1.78512	-0.538041	5e-05	0.00190212	yes
RARRES1	3:158414896-158450275	18.9002	5.49933	-1.78107	-0.245175	5e-05	0.00190212	yes
EFCAB1	8:49627473-49647870	2.56391	0.752189	-1.76918	-0.460569	5e-05	0.00190212	yes
TTR	18:29171729-29178986	0.41379	0.121737	-1.76513	-0.216701	5e-05	0.00190212	yes
GPR88	1:101003727-101007583	2.57396	0.761125	-1.75778	-0.549535	5e-05	0.00190212	yes
IFI6	1:27992571-27998724	923.898	273.812	-1.75455	-0.788439	5e-05	0.00190212	yes
C1orf158	1:12806133-12821102	3.35642	0.999041	-1.74831	-0.418861	5e-05	0.00190212	yes
FAM92B	16:85131957-85146114	0.357527	0.107006	-1.74036	-0.253815	5e-05	0.00190212	yes
CALB2	16:71392615-71424342	6.14485	1.8412	-1.73873	-0.475798	5e-05	0.00190212	yes
TGM3	20:2276612-2321725	0.488684	0.146789	-1.73516	-0.278121	5e-05	0.00190212	yes
CCDC33	15:74528629-74628482	0.32234	0.0979466	-1.71852	-0.235649	5e-05	0.00190212	yes
OPALIN	10:98102974-98119122	3.25845	0.991201	-1.71694	-0.553837	5e-05	0.00190212	yes
CFAP161	15:81426587-81441516	1.19912	0.366083	-1.71174	-0.325113	5e-05	0.00190212	yes
DNAI1	9:34458749-34520987	0.40512	0.124835	-1.69833	-0.330003	5e-05	0.00190212	yes
CXCL11	4:76932332-77033955	6.22642	1.93211	-1.68822	-0.348027	5e-05	0.00190212	yes
LINC00364	13:67946518-67954126	0.412628	0.130315	-1.66284	-0.201051	5e-05	0.00190212	yes
IDO1	8:39771327-39786309	1.84758	0.585806	-1.65714	-0.391148	5e-05	0.00190212	yes
ETNPPL	4:109663201-109684235	15.3127	4.89689	-1.64479	-0.645031	5e-05	0.00190212	yes
PI16	6:36916038-36932613	23.39	7.49562	-1.64177	-0.621785	5e-05	0.00190212	yes
LOC100996654	7:54827005-54872656	14.5123	4.65381	-1.64079	-0.20635	5e-05	0.00190212	yes
LINC00707	10:6821559-6884868	0.419737	0.134959	-1.63697	-0.284572	5e-05	0.00190212	yes
ARMC3	10:23216952-23327452	1.16746	0.377668	-1.62819	-0.396189	5e-05	0.00190212	yes
IFI27	14:94577078-94583036	261.126	86.1617	-1.59963	-0.753265	5e-05	0.00190212	yes
LINCR-0003	5:56866168-56913254	0.39944	0.132111	-1.59623	-0.22434	5e-05	0.00190212	yes
UPK3A	22:45680867-45691755	1.21821	0.405822	-1.58584	-0.29574	5e-05	0.00190212	yes
MORN5	9:124922186-124962367	9.2848	3.09675	-1.58412	-0.468615	5e-05	0.00190212	yes
FEZF1-AS1	7:121941362-121950131	1.5627	0.525412	-1.57252	-0.31968	5e-05	0.00190212	yes
PGAM2	7:44102325-44105186	69.0624	23.295	-1.56788	-0.855028	5e-05	0.00190212	yes
CCL19	9:34689566-34691274	1.01448	0.342204	-1.56781	-0.273403	5e-05	0.00190212	yes
IFIT3	10:91087575-91100725	40.317	13.6057	-1.56717	-1.05077	5e-05	0.00190212	yes
CMPK2	2:6980683-7006766	10.0145	3.39705	-1.55973	-0.822129	5e-05	0.00190212	yes
OAS2	12:113416273-113449528	20.5578	7.02745	-1.54861	-0.912045	5e-05	0.00190212	yes
CFAP65	2:219866936-219906273	0.651451	0.22307	-1.54616	-0.335905	5e-05	0.00190212	yes
NMUR2	5:151771101-151784840	0.361416	0.124759	-1.53452	-0.211826	5e-05	0.00190212	yes
LTF	3:46477495-46526724	374.304	129.849	-1.52737	-0.150725	5e-05	0.00190212	yes
GBP3	1:89472359-89488549	18.4488	6.42938	-1.52078	-0.938954	5e-05	0.00190212	yes
VSTM2A	7:54610017-54639419	9.84554	3.4351	-1.51912	-0.208374	5e-05	0.00190212	yes
AK7	14:96858424-96955764	0.592778	0.20755	-1.51403	-0.355974	5e-05	0.00190212	yes
ROPN1L	5:10441973-10465138	3.24219	1.13726	-1.51141	-0.371699	5e-05	0.00190212	yes
OAS1	12:113344581-113369995	37.6046	13.2066	-1.50965	-0.839806	5e-05	0.00190212	yes
AKR1B10	7:134212343-134226166	0.442088	0.155576	-1.50672	-0.253588	5e-05	0.00190212	yes
CFAP100	3:126113781-126155398	0.740098	0.260978	-1.50379	-0.297343	5e-05	0.00190212	yes
MT1DP	16:56677598-56678853	1.08965	0.387266	-1.49246	-0.258538	5e-05	0.00190212	yes
KIF6	6:39297765-39693199	1.99799	0.710261	-1.49213	-0.429829	5e-05	0.00190212	yes
PYGM	11:64513860-64528187	5.83677	2.08533	-1.4849	-0.606736	5e-05	0.00190212	yes
SPINK2	4:57676025-57688035	0.800138	0.286561	-1.48141	-0.234018	5e-05	0.00190212	yes
DDIT4L	4:101107026-101136662	13.2172	4.75577	-1.47467	-0.764321	5e-05	0.00190212	yes
LINC01485	5:173213792-173217945	1.18012	0.427495	-1.46495	-0.273549	5e-05	0.00190212	yes
RNF43	17:56378587-56494943	0.33227	0.120757	-1.46024	-0.112527	5e-05	0.00190212	yes
AKR1C1	10:5005453-5020158	6.40627	2.32942	-1.45951	-0.34692	5e-05	0.00190212	yes
HPSE2	10:100216833-100995632	0.429937	0.156333	-1.4595	-0.329901	5e-05	0.00190212	yes
HAS1	19:52216364-52227245	0.801078	0.292979	-1.45115	-0.227755	5e-05	0.00190212	yes
DYNLRB2	16:80189854-80597032	3.72731	1.37433	-1.4394	-0.352986	5e-05	0.00190212	yes
DYDC2	10:82095860-82127829	0.626748	0.231872	-1.43455	-0.261104	5e-05	0.00190212	yes
TTC29	4:147627789-147867038	0.543032	0.200966	-1.43408	-0.301485	5e-05	0.00190212	yes
GBP1	1:89517986-89531043	43.9492	16.3058	-1.43045	-0.775747	5e-05	0.00190212	yes
AKAP14	X:119029935-119054679	1.53916	0.573118	-1.42524	-0.230036	5e-05	0.00190212	yes
GMPR	6:16238810-16295780	30.7858	11.4728	-1.42405	-0.82384	5e-05	0.00190212	yes
HERC6	4:89299890-89364249	11.5216	4.30936	-1.4188	-0.847496	5e-05	0.00190212	yes
RARRES3	11:63304272-63313930	177.973	66.5915	-1.41825	-0.807767	5e-05	0.00190212	yes
VWA3B	2:98703594-98929410	0.785613	0.294949	-1.41335	-0.41033	5e-05	0.00190212	yes
KRT17	17:39775691-39780882	2.8121	1.05658	-1.41225	-0.289812	5e-05	0.00190212	yes
ADIG	20:37209837-37217106	0.572936	0.216356	-1.40497	-0.256958	5e-05	0.00190212	yes
NTS	12:86268072-86276770	0.435603	0.165489	-1.39628	-0.162809	5e-05	0.00190212	yes
C5orf46	5:147272270-147286101	1.08395	0.412172	-1.39498	-0.17396	5e-05	0.00190212	yes
PRSS33	16:2833953-2836708	0.422498	0.161062	-1.39133	-0.238946	5e-05	0.00190212	yes
CFAP52	17:9479943-9546776	3.00491	1.14789	-1.38834	-0.443676	5e-05	0.00190212	yes
IQCA1	2:237232789-237416178	2.19964	0.840337	-1.38823	-0.507901	5e-05	0.00190212	yes
FAM180B	11:47608229-47610746	1.19194	0.455407	-1.38808	-0.280991	5e-05	0.00190212	yes
BISPR	19:17516494-17536148	7.00459	2.67914	-1.38653	-0.424808	5e-05	0.00190212	yes
BMPR1B-AS1	4:95664818-95678684	0.384445	0.147767	-1.37945	-0.226243	5e-05	0.00190212	yes
RANBP3L	5:36247020-36302011	6.83053	2.64255	-1.37007	-0.786114	5e-05	0.00190212	yes
VSTM1	19:54544079-54567207	1.10278	0.426857	-1.36933	-0.275095	5e-05	0.00190212	yes
DRC7	16:57728712-57765367	1.23905	0.480996	-1.36514	-0.392699	5e-05	0.00190212	yes
APOL1	22:36649116-36663577	17.6773	6.90057	-1.35711	-0.730942	5e-05	0.00190212	yes
HSH2D	19:16244837-16269384	0.506871	0.20239	-1.32448	-0.307552	5e-05	0.00190212	yes
NUP62CL	X:106366656-106449670	0.45017	0.180291	-1.32014	-0.230929	5e-05	0.00190212	yes
LGALS2	22:37966252-37976024	1.08559	0.43478	-1.32012	-0.195964	5e-05	0.00190212	yes
C7orf57	7:48075107-48100894	3.76063	1.5179	-1.3089	-0.44335	5e-05	0.00190212	yes
HCG22	6_ssto_hap7:2356207-2362626	1.71124	0.691016	-1.30825	-0.376968	5e-05	0.00190212	yes
LCN2	9:130911708-130915734	0.725717	0.294465	-1.30131	-0.193753	5e-05	0.00190212	yes
OAS3	12:113376237-113411055	17.849	7.30207	-1.28947	-0.688257	5e-05	0.00190212	yes
PHOSPHO1	17:47300731-47308128	1.32269	0.542375	-1.28612	-0.258351	5e-05	0.00190212	yes
ALDH3A1	17:19641297-19651746	1.8261	0.750244	-1.28333	-0.354954	5e-05	0.00190212	yes
IFIT2	10:91061705-91069033	13.3781	5.51778	-1.27772	-0.652058	5e-05	0.00190212	yes
ZMYND12	1:42896000-43119861	3.69367	1.52448	-1.27674	-0.283849	5e-05	0.00190212	yes
LMNTD1	12:25629015-25801496	0.647116	0.26784	-1.27265	-0.303396	5e-05	0.00190212	yes
CCL11	17:32612686-32615199	0.449648	0.186483	-1.26975	-0.113451	5e-05	0.00190212	yes
LINC00310	21:35552977-35562220	1.13584	0.474317	-1.25984	-0.247695	5e-05	0.00190212	yes
ANKUB1	3:149479225-149510610	0.332789	0.13915	-1.25797	-0.215809	5e-05	0.00190212	yes
ZNF385B	2:180306710-180726232	1.45324	0.609132	-1.25444	-0.362755	5e-05	0.00190212	yes
IFIH1	2:163123588-163175218	7.97206	3.36741	-1.24331	-0.650763	5e-05	0.00190212	yes
LAMA3	18:21269406-21535029	0.617412	0.263247	-1.22982	-0.322522	5e-05	0.00190212	yes
LINC01206	3:181670151-181728464	0.373385	0.15925	-1.22937	-0.286178	5e-05	0.00190212	yes
CFAP99	4:2420671-2464690	0.528521	0.226734	-1.22096	-0.242687	5e-05	0.00190212	yes
NUPR2	7:56182373-56184090	0.426563	0.183181	-1.21949	-0.194152	5e-05	0.00190212	yes
PNMT	17:37824233-37826728	3.37002	1.45936	-1.20742	-0.292626	5e-05	0.00190212	yes
TMPRSS3	21:43791995-43816955	1.13076	0.492761	-1.19833	-0.258095	5e-05	0.00190212	yes
GAS2L2	17:34071529-34079897	0.39615	0.172945	-1.19574	-0.240513	5e-05	0.00190212	yes
PIFO	1:111889181-111895639	20.1239	8.80212	-1.19299	-0.721229	5e-05	0.00190212	yes
DLEC1	3:38080695-38178733	1.37463	0.602844	-1.18919	-0.237787	5e-05	0.00190212	yes
ETV7	6:36321997-36355577	2.9159	1.28452	-1.18271	-0.377873	5e-05	0.00190212	yes
OLFM4	13:53602875-53626196	0.346182	0.153806	-1.17042	-0.251333	5e-05	0.00190212	yes
CCL17	16:57438678-57449974	0.474349	0.211496	-1.16532	-0.176542	5e-05	0.00190212	yes
FOLR1	11:71900601-71907367	7.01047	3.13116	-1.16281	-0.428868	5e-05	0.00190212	yes
USP18	22:18632757-18660162	11.0855	4.95525	-1.16165	-0.617923	5e-05	0.00190212	yes
DTHD1	4:36283236-36346407	0.456229	0.206912	-1.14074	-0.239185	5e-05	0.00190212	yes
CARTPT	5:71014989-71016875	0.864533	0.394845	-1.13064	-0.1614	5e-05	0.00190212	yes
HCP5	6_ssto_hap7:2761726-2764356	11.8854	5.45692	-1.12303	-0.593318	5e-05	0.00190212	yes
CPAMD8	19:17003757-17137625	1.65096	0.758236	-1.12258	-0.21458	5e-05	0.00190212	yes
BST2	19:17513747-17516457	196.717	90.6013	-1.11852	-0.5712	5e-05	0.00190212	yes
PPP1R42	8:67899910-67940786	2.77681	1.28417	-1.1126	-0.213822	5e-05	0.00190212	yes
RIBC1	X:53449804-53458068	4.66169	2.16864	-1.10406	-0.408273	5e-05	0.00190212	yes
CASC1	12:25150495-25348096	1.43458	0.66801	-1.10268	-0.290887	5e-05	0.00190212	yes
C8orf34	8:69215702-69731258	2.41025	1.12437	-1.10006	-0.381524	5e-05	0.00190212	yes
IFITM1	11:313990-315272	152.296	71.2154	-1.09662	-0.613994	5e-05	0.00190212	yes
AGR3	7:16899029-16921613	0.806963	0.381873	-1.07941	-0.15885	5e-05	0.00190212	yes
LMO3	12:16701305-16761148	26.1084	12.6922	-1.04058	-0.630328	5e-05	0.00190212	yes
TPPP3	16:67423709-67427438	136.199	67.0761	-1.02184	-0.576044	5e-05	0.00190212	yes
SAMD9L	7:92759366-92777712	8.47007	4.17562	-1.02038	-0.711979	5e-05	0.00190212	yes
HERC5	4:89378267-89427319	8.86393	4.39962	-1.01057	-0.545252	5e-05	0.00190212	yes
FAM189A2	9:71939487-72007390	13.3141	6.61492	-1.00915	-0.59168	5e-05	0.00190212	yes
PSMB9	6_ssto_hap7:4252710-4258398	83.7646	41.6359	-1.00851	-0.590061	5e-05	0.00190212	yes
XAF1	17:6658765-6678964	14.1846	7.05299	-1.00802	-0.64201	5e-05	0.00190212	yes
VCAM1	1:101185195-101204601	28.3234	14.1435	-1.00185	-0.668291	5e-05	0.00190212	yes
C9orf135	9:72435720-72521151	0.591356	0.295647	-1.00015	-0.177283	5e-05	0.00190212	yes
SNTA1	20:31995762-32031698	51.9549	26.05	-0.995976	-0.499066	5e-05	0.00190212	yes
MGST1	12:16500075-16530123	156.866	79.4478	-0.981452	-0.556408	5e-05	0.00190212	yes
PARP12	7:139723543-139763521	12.8429	6.56328	-0.968485	-0.592346	5e-05	0.00190212	yes
STAT1	2:191833761-191878976	68.0948	34.8878	-0.96482	-0.611473	5e-05	0.00190212	yes
PLD4	14:105391152-105399573	21.8632	11.214	-0.963201	-0.522626	5e-05	0.00190212	yes
SH3BGR	21:40752169-40887433	37.6991	19.3727	-0.960507	-0.366225	5e-05	0.00190212	yes
HLA-F	6_ssto_hap7:1028896-1054576	52.3018	27.0169	-0.952998	-0.573944	5e-05	0.00190212	yes
CD38	4:15779887-15854866	5.65883	2.95012	-0.939732	-0.535807	5e-05	0.00190212	yes
ITGB4	17:73717407-73753899	33.2399	17.4362	-0.930831	-0.572263	5e-05	0.00190212	yes
IL15	4:142557748-142655140	1.41981	0.746915	-0.926678	-0.286003	5e-05	0.00190212	yes
SLC39A12	10:18240767-18332221	4.40464	2.33086	-0.918164	-0.402187	5e-05	0.00190212	yes
SP140	2:231090444-231177930	1.44233	0.763801	-0.917129	-0.228725	5e-05	0.00190212	yes
LIX1	5:96427573-96478520	16.3474	8.68194	-0.912974	-0.495021	5e-05	0.00190212	yes
CSRP1	1:201452657-201476387	284.131	151.262	-0.909505	-0.511983	5e-05	0.00190212	yes
LINC00836	10:25940640-26021864	2.03806	1.08727	-0.906481	-0.245079	5e-05	0.00190212	yes
LINC00320	21:22114907-22175426	2.78679	1.48695	-0.906251	-0.319622	5e-05	0.00190212	yes
PLA2G5	1:20396700-20418394	23.7848	12.735	-0.90124	-0.468084	5e-05	0.00190212	yes
TEX26	13:31506833-31549639	3.70684	1.98581	-0.90046	-0.306899	5e-05	0.00190212	yes
GGTA1P	9:124217318-124262306	18.8168	10.0816	-0.900297	-0.492739	5e-05	0.00190212	yes
PARP14	3:122399671-122449687	10.0507	5.45603	-0.881378	-0.666743	5e-05	0.00190212	yes
DMKN	19:35988118-36004560	2.42733	1.3222	-0.876426	-0.177705	5e-05	0.00190212	yes
IFI44	1:79115473-79129763	35.1903	19.3179	-0.86524	-0.579479	5e-05	0.00190212	yes
DDX60	4:169137441-169239958	4.05945	2.25155	-0.850368	-0.543761	5e-05	0.00190212	yes
GRAMD2B	5:125695787-125829853	33.3087	18.4826	-0.849732	-0.686137	5e-05	0.00190212	yes
APOL6	22:36044423-36064456	5.70044	3.16629	-0.848279	-0.503904	5e-05	0.00190212	yes
IFITM3	11:319672-320914	1045.11	581.226	-0.846489	-0.455628	5e-05	0.00190212	yes
PBXIP1	1:154916558-154928639	92.7733	52.6514	-0.817239	-0.606843	5e-05	0.00190212	yes
HNMT	2:138721807-138773934	33.8922	19.2708	-0.814537	-0.464418	5e-05	0.00190212	yes
RAMP3	7:45197366-45223850	26.9399	15.3564	-0.810907	-0.432984	5e-05	0.00190212	yes
ACSM5	16:20420855-20452654	3.85642	2.23156	-0.789207	-0.313181	5e-05	0.00190212	yes
SP110	2:231033644-231090444	10.9416	6.33713	-0.78792	-0.470755	5e-05	0.00190212	yes
KRIT1	7:91828282-91875414	13.2011	7.69617	-0.778448	-0.267932	5e-05	0.00190212	yes
BTN3A3	6:26440699-26453643	15.3782	8.98082	-0.775969	-0.512842	5e-05	0.00190212	yes
PSMB8-AS1	6_ssto_hap7:4239266-4252521	18.0672	10.5549	-0.775455	-0.132201	5e-05	0.00190212	yes
ANXA1	9:75766646-75785310	271.514	160.428	-0.759097	-0.41858	5e-05	0.00190212	yes
HLA-E	6_ssto_hap7:1789472-1794272	311.213	185.226	-0.74862	-0.403337	5e-05	0.00190212	yes
DMTN	8:21906465-21940038	15.0501	9.03247	-0.736583	-0.444628	5e-05	0.00190212	yes
PLSCR4	3:145910123-145968966	17.717	10.8016	-0.713888	-0.497699	5e-05	0.00190212	yes
RGS10	10:121259338-121302222	50.1938	30.7461	-0.707104	-0.44812	5e-05	0.00190212	yes
PAQR8	6:52226925-52272575	22.6819	13.936	-0.702724	-0.519058	5e-05	0.00190212	yes
CYSTM1	5:139554652-139623374	86.4233	53.545	-0.690668	-0.507383	5e-05	0.00190212	yes
ALDH4A1	1:19197923-19229293	38.0087	23.6511	-0.684422	-0.529247	5e-05	0.00190212	yes
BHLHE41	12:26272958-26278003	31.5513	19.7877	-0.673095	-0.507984	5e-05	0.00190212	yes
LST1	6_ssto_hap7:2884757-2891563	36.6765	23.0633	-0.669257	-0.374669	5e-05	0.00190212	yes
AGTRAP	1:11796141-11810828	62.5793	39.4236	-0.666627	-0.456059	5e-05	0.00190212	yes
IRF9	14:24630421-24635774	50.9016	32.3479	-0.65404	-0.490281	5e-05	0.00190212	yes
IFI27L2	14:94594117-94595957	180.686	118.878	-0.603995	-0.445028	5e-05	0.00190212	yes
NDRG2	14:21484921-21572863	320.374	212.265	-0.593889	-0.238404	5e-05	0.00190212	yes
SORL1	11:121322911-121504471	18.3448	12.2758	-0.57956	-0.428412	5e-05	0.00190212	yes
CACNG7	19:54415990-54446969	31.7903	49.3804	0.635353	0.46303	5e-05	0.00190212	yes
DCHS1	11:6642554-6677080	6.11669	9.68273	0.662663	0.502	5e-05	0.00190212	yes
STC1	8:23699433-23712320	2.76733	4.46309	0.689548	0.345599	5e-05	0.00190212	yes
RBFOX2	22:36134780-36424585	8.24208	13.3208	0.692602	0.49187	5e-05	0.00190212	yes
MDM2	12:69201951-69239324	37.2827	60.3418	0.694651	0.0531257	5e-05	0.00190212	yes
LZTS1	8:20103675-20112803	8.24027	13.4579	0.707687	0.361573	5e-05	0.00190212	yes
POSTN	13:38136718-38172981	46.3856	75.8189	0.708879	0.138042	5e-05	0.00190212	yes
FAM83D	20:37554954-37581703	3.80872	6.30769	0.727805	0.381451	5e-05	0.00190212	yes
SEMA6C	1:151104162-151119140	3.89272	6.49083	0.737624	0.400795	5e-05	0.00190212	yes
C1QTNF6	22:37576205-37584330	6.86275	11.6564	0.764265	0.432808	5e-05	0.00190212	yes
SLC35E3	12:69139865-69162470	7.48622	12.8011	0.773961	0.095541	5e-05	0.00190212	yes
S1PR2	19:10332108-10341948	2.87788	4.92556	0.77528	0.405817	5e-05	0.00190212	yes
VEGFA	6:43737945-43754223	98.9816	170.036	0.780608	0.320371	5e-05	0.00190212	yes
WSCD1	17:5973933-6027747	18.9519	32.5702	0.781208	0.481989	5e-05	0.00190212	yes
GRIA2	4:158141735-158287226	7.21987	12.5131	0.793389	0.51825	5e-05	0.00190212	yes
NID2	14:52471519-52535946	3.6239	6.37417	0.814693	0.469251	5e-05	0.00190212	yes
RCOR2	11:63678692-63684316	6.8023	12.0971	0.830567	0.464193	5e-05	0.00190212	yes
CELSR3	3:48673895-48700348	1.48045	2.69061	0.861897	0.479725	5e-05	0.00190212	yes
CBX2	17:77751976-77761449	2.44861	4.48017	0.871592	0.419604	5e-05	0.00190212	yes
NGFR	17:47572654-47651426	8.85639	16.5899	0.905516	0.498303	5e-05	0.00190212	yes
LBH	2:30454396-30482899	15.05	28.3761	0.914913	0.561325	5e-05	0.00190212	yes
CPM	12:69244955-69357020	7.90944	15.061	0.92917	0.10294	5e-05	0.00190212	yes
SPRY4	5:141689991-141704620	13.5727	25.9059	0.932576	0.546971	5e-05	0.00190212	yes
OS9	12:58087737-58115340	162.399	312.275	0.943274	0.119091	5e-05	0.00190212	yes
MEX3A	1:156041803-156051789	5.02242	9.67295	0.945575	0.500779	5e-05	0.00190212	yes
CCND1	11:69455872-69469242	15.1044	29.4999	0.965737	0.599335	5e-05	0.00190212	yes
NKX2-2	20:21491659-21494664	8.97517	17.5523	0.967651	0.5497	5e-05	0.00190212	yes
CACNG4	17:64960979-65029518	23.5184	46.1947	0.973938	0.496414	5e-05	0.00190212	yes
CELF3	1:151672533-151689296	2.06581	4.0882	0.984754	0.490983	5e-05	0.00190212	yes
TMEM132B	12:125811161-126146923	2.84321	5.62947	0.985479	0.589681	5e-05	0.00190212	yes
ADGRB1	8:143545376-143626368	10.1755	20.1678	0.986957	0.530856	5e-05	0.00190212	yes
MIR4697HG	11:133766329-133771635	4.94722	9.81331	0.988121	0.570516	5e-05	0.00190212	yes
FREM2	13:39261172-39461267	1.28483	2.5654	0.997605	0.582227	5e-05	0.00190212	yes
MMP16	8:89049459-89339717	1.98917	3.99573	1.00629	0.583903	5e-05	0.00190212	yes
SLC1A1	9:4490426-4587469	3.56402	7.19854	1.0142	0.548225	5e-05	0.00190212	yes
IGF2BP2	3:185360918-185542844	2.57378	5.21499	1.01878	0.513857	5e-05	0.00190212	yes
SAPCD2	9:139956578-139965028	6.55867	13.4338	1.03439	0.576151	5e-05	0.00190212	yes
NETO1	18:70409548-70534907	1.20975	2.52184	1.05977	0.388616	5e-05	0.00190212	yes
SOX11	2:5832798-5841517	5.71555	12.2022	1.09418	0.630557	5e-05	0.00190212	yes
STK32B	4:5053243-5502728	4.22813	9.08138	1.10289	0.667475	5e-05	0.00190212	yes
PLPPR1	9:103791030-104087417	9.99478	21.619	1.11305	0.629298	5e-05	0.00190212	yes
MDM4	1:204485506-204527248	5.06272	11.0569	1.12696	0.212627	5e-05	0.00190212	yes
COL13A1	10:71561643-71718904	0.544087	1.18892	1.12774	0.309461	5e-05	0.00190212	yes
DCSTAMP	8:105352023-105368917	0.200146	0.437507	1.12825	0.195029	5e-05	0.00190212	yes
BARHL1	9:135457992-135465640	0.18018	0.394022	1.12883	0.224176	5e-05	0.00190212	yes
MCTP2	15:94841429-95027181	0.198258	0.435641	1.13576	0.243061	5e-05	0.00190212	yes
HIST1H2BF	6:26199786-26200216	0.668902	1.47071	1.13665	0.156378	5e-05	0.00190212	yes
CENPVL3	X:51359873-51361770	0.179283	0.396532	1.1452	0.199919	5e-05	0.00190212	yes
MEG3	14:101292444-101327360	18.5361	41.0436	1.14682	0.455805	5e-05	0.00190212	yes
HIST1H4E	6:26204872-26205249	2.54415	5.63956	1.1484	0.189189	5e-05	0.00190212	yes
MFAP2	1:17300998-17308081	14.7334	32.7568	1.1527	0.267656	5e-05	0.00190212	yes
NXPH1	7:8473584-8792593	5.2724	11.7296	1.15362	0.629006	5e-05	0.00190212	yes
COL11A2	6_ssto_hap7:4610635-4637414	1.10641	2.47163	1.15957	0.289237	5e-05	0.00190212	yes
COL11A1	1:103342022-103574052	2.72627	6.09094	1.15974	0.416815	5e-05	0.00190212	yes
NMU	4:56461395-56502865	1.83674	4.11654	1.16428	0.317923	5e-05	0.00190212	yes
HIST1H3G	6:26271145-26271612	0.882589	1.98121	1.16657	0.165444	5e-05	0.00190212	yes
SLC8A3	14:70510933-70699300	1.68399	3.78278	1.16756	0.496986	5e-05	0.00190212	yes
KCNK9	8:140613080-140715299	0.466093	1.05839	1.18318	0.290832	5e-05	0.00190212	yes
ADGRG2	X:19007424-19140755	0.168979	0.38809	1.19954	0.264122	5e-05	0.00190212	yes
HIST1H2BL	6:27775256-27775709	0.349643	0.805361	1.20375	0.167971	5e-05	0.00190212	yes
DCUN1D4	4:52709165-52783003	9.82976	22.6747	1.20585	0.148772	5e-05	0.00190212	yes
WNT10A	2:219745254-219758651	0.408576	0.946308	1.21171	0.244681	5e-05	0.00190212	yes
COL3A1	2:189839098-189877472	63.4433	147.291	1.21513	0.196874	5e-05	0.00190212	yes
CYP26A1	10:94833231-94837641	0.298146	0.695661	1.22236	0.214624	5e-05	0.00190212	yes
CENPV	17:16245847-16256812	17.2603	40.2831	1.22272	0.655222	5e-05	0.00190212	yes
GPC2	7:99767228-99775049	4.90175	11.5544	1.23707	0.629515	5e-05	0.00190212	yes
CD207	2:71057342-71062953	0.139559	0.329117	1.23772	0.238672	5e-05	0.00190212	yes
NR0B1	X:30322538-30327495	1.11448	2.63494	1.2414	0.323493	5e-05	0.00190212	yes
FGF18	5:170846666-170884630	0.170404	0.403377	1.24317	0.209997	5e-05	0.00190212	yes
GOLT1A	1:204167287-204183220	2.15715	5.10938	1.24402	0.23517	5e-05	0.00190212	yes
PIK3C2B	1:204391757-204459474	2.50153	5.93266	1.24587	0.301662	5e-05	0.00190212	yes
LNX1	4:54326436-54457753	2.92736	6.95645	1.24875	0.297272	5e-05	0.00190212	yes
C12orf66	12:64580091-64616076	3.13579	7.56064	1.26968	0.276446	5e-05	0.00190212	yes
DKK2	4:107842958-107957453	0.266836	0.646462	1.27661	0.292215	5e-05	0.00190212	yes
REM1	20:30063090-30072708	0.597716	1.4508	1.27932	0.282941	5e-05	0.00190212	yes
NKX6-1	4:85414435-85419387	0.623722	1.53459	1.29888	0.286655	5e-05	0.00190212	yes
RNFT2	12:117176095-117291436	3.91152	9.64257	1.30169	0.205272	5e-05	0.00190212	yes
ESR2	14:64693429-64805268	0.298053	0.73847	1.30897	0.268456	5e-05	0.00190212	yes
NPPB	1:11917520-11918992	0.414923	1.02972	1.31134	0.174247	5e-05	0.00190212	yes
GFRA1	10:117816441-118033157	0.614599	1.54656	1.33134	0.409462	5e-05	0.00190212	yes
SLC17A6	11:22359666-22401046	0.272891	0.690369	1.33904	0.326205	5e-05	0.00190212	yes
EPO	7:100318422-100321323	0.157579	0.402342	1.35235	0.238148	5e-05	0.00190212	yes
HIST1H1B	6:27834569-27835359	0.701149	1.79273	1.35437	0.198063	5e-05	0.00190212	yes
HIST1H2AH	6:27114860-27115341	0.316346	0.809402	1.35535	0.164276	5e-05	0.00190212	yes
NTSR1	20:61340188-61394123	0.232971	0.599839	1.36443	0.256039	5e-05	0.00190212	yes
CACNG5	17:64873390-64881395	0.276795	0.716741	1.37263	0.222489	5e-05	0.00190212	yes
HIST1H2AL	6:27833106-27833576	0.478887	1.24173	1.37459	0.197584	5e-05	0.00190212	yes
MARCH9	12:58148880-58154193	27.1254	70.3443	1.37479	0.313536	5e-05	0.00190212	yes
VAX1	10:118888031-118897812	0.229332	0.601129	1.39023	0.241059	5e-05	0.00190212	yes
CA10	17:49707673-50237377	3.65596	9.58392	1.39037	0.569611	5e-05	0.00190212	yes
LBX1-AS1	10:102989350-102998616	0.177335	0.46638	1.39503	0.240684	5e-05	0.00190212	yes
GABRQ	X:151806636-151821825	0.772708	2.05958	1.41436	0.293151	5e-05	0.00190212	yes
FIGNL2	12:52211675-52225701	0.289734	0.773154	1.41603	0.357308	5e-05	0.00190212	yes
LOC105379252	9:69381811-69481677	0.613681	1.63918	1.41741	0.371471	5e-05	0.00190212	yes
LOC285097	2:242823513-243026289	0.193241	0.516481	1.41832	0.329125	5e-05	0.00190212	yes
NPR3	5:32710742-32791830	0.226629	0.609971	1.42841	0.363573	5e-05	0.00190212	yes
LINC01224	19:23582035-23598876	0.547741	1.47459	1.42875	0.438539	5e-05	0.00190212	yes
HIST1H3A	6:26020717-26021186	0.15098	0.40675	1.42978	0.172284	5e-05	0.00190212	yes
SLC18A1	8:20002365-20040717	0.180785	0.487457	1.431	0.281038	5e-05	0.00190212	yes
GGT8P	2:91963367-91970153	0.169915	0.459077	1.43392	0.291749	5e-05	0.00190212	yes
DCX	X:110537006-110655460	2.80217	7.58027	1.4357	0.717884	5e-05	0.00190212	yes
DMRT2	9:1050345-1057554	0.462124	1.25441	1.44066	0.355072	5e-05	0.00190212	yes
CLIC6	21:36041461-36090525	0.276697	0.759989	1.45767	0.373415	5e-05	0.00190212	yes
HOXB9	17:46698518-46703835	0.246158	0.678744	1.46328	0.279112	5e-05	0.00190212	yes
ARHGAP28	18:6834431-6915712	0.328158	0.905122	1.46372	0.360825	5e-05	0.00190212	yes
COL9A3	20:61448413-61493115	12.0513	33.3267	1.46749	0.677622	5e-05	0.00190212	yes
TLX1	10:102849077-102901023	0.439846	1.21831	1.46982	0.326499	5e-05	0.00190212	yes
IGLON5	19:51815101-51834122	3.98626	11.0546	1.47153	0.796008	5e-05	0.00190212	yes
TRIM67	1:231298673-231357314	0.266226	0.745155	1.48489	0.478857	5e-05	0.00190212	yes
HOXA13	7:27236498-27239725	0.438547	1.23108	1.48912	0.336647	5e-05	0.00190212	yes
DLL1	6:170591293-170599697	6.88856	19.3408	1.48937	0.139331	5e-05	0.00190212	yes
HIST2H2AB	1:149859018-149859466	0.206782	0.581678	1.49211	0.172187	5e-05	0.00190212	yes
BHLHE22	8:65492794-65496191	0.241168	0.678771	1.49289	0.317635	5e-05	0.00190212	yes
SALL4	20:50399255-50419062	0.253158	0.713008	1.49388	0.328114	5e-05	0.00190212	yes
HIST1H3F	6:26250369-26250835	0.552965	1.57422	1.50937	0.190173	5e-05	0.00190212	yes
ELDR	7:55306128-55323328	0.286361	0.817607	1.51357	0.219598	5e-05	0.00190212	yes
IRX2	5:2746278-2751769	0.46219	1.32218	1.51636	0.376646	5e-05	0.00190212	yes
HIST1H4C	6:26104175-26104565	1.14402	3.27343	1.51669	0.198436	5e-05	0.00190212	yes
SCGB3A2	5:147258273-147261756	0.188759	0.541246	1.51974	0.191293	5e-05	0.00190212	yes
HIST1H4D	6:26188937-26189304	0.583444	1.68744	1.53217	0.192669	5e-05	0.00190212	yes
TERT	5:1253286-1295162	0.161479	0.467507	1.53364	0.356722	5e-05	0.00190212	yes
SLC26A10	12:58012187-58027022	1.97963	5.75343	1.53919	0.0982075	5e-05	0.00190212	yes
CTLA4	2:204732510-204738683	0.329464	0.959249	1.54179	0.223869	5e-05	0.00190212	yes
DACT2	6:168693509-168720434	0.38482	1.12707	1.55032	0.386305	5e-05	0.00190212	yes
GSX1	13:28366779-28368089	1.53375	4.5046	1.55433	0.422626	5e-05	0.00190212	yes
PRKG2	4:82008523-82136271	0.121016	0.358359	1.56621	0.298534	5e-05	0.00190212	yes
B4GALNT1	12:58012187-58027022	13.2217	39.5754	1.5817	0.243431	5e-05	0.00190212	yes
LRRC66	4:52859807-52883786	0.362591	1.08929	1.58697	0.410727	5e-05	0.00190212	yes
MEG9	14:101536247-101539273	0.362905	1.09193	1.58921	0.392602	5e-05	0.00190212	yes
CD24	Y:21034386-21438350	34.8823	105	1.58983	1.02241	5e-05	0.00190212	yes
SCRT2	20:642239-656823	0.629825	1.89875	1.59202	0.452025	5e-05	0.00190212	yes
ACAN	15:89346673-89418585	0.476653	1.43928	1.59434	0.566924	5e-05	0.00190212	yes
LINC02488	5:86957858-86975226	0.187974	0.583198	1.63346	0.271938	5e-05	0.00190212	yes
HIST1H3B	6:26031816-26032288	0.952368	2.96958	1.64067	0.217755	5e-05	0.00190212	yes
ECEL1	2:233344536-233352569	0.511283	1.59682	1.643	0.333303	5e-05	0.00190212	yes
GLRA3	4:175563161-175750466	0.112201	0.351204	1.64623	0.26577	5e-05	0.00190212	yes
HIST1H3I	6:27839622-27840099	0.262218	0.821889	1.64818	0.200466	5e-05	0.00190212	yes
TRIM71	3:32859509-32939318	0.108409	0.340585	1.65154	0.440566	5e-05	0.00190212	yes
CRABP2	1:156669399-156675608	10.2577	32.3676	1.65785	0.310648	5e-05	0.00190212	yes
MNX1	7:156797546-156803347	0.328841	1.05018	1.67517	0.388363	5e-05	0.00190212	yes
HIST1H4B	6:26027123-26027480	0.39283	1.26675	1.68915	0.220738	5e-05	0.00190212	yes
LOC100505797	18:70535622-70548634	1.08924	3.514	1.6898	0.370004	5e-05	0.00190212	yes
CYP27B1	12:58156116-58160976	2.01017	6.57806	1.71035	0.440696	5e-05	0.00190212	yes
HIST1H1E	6:26156558-26157343	0.788743	2.59504	1.71813	0.250238	5e-05	0.00190212	yes
HIST1H3J	6:27858092-27858570	0.382449	1.26738	1.72851	0.229945	5e-05	0.00190212	yes
SLC29A1	6:44187241-44201888	23.2926	77.2072	1.72886	0.0498069	5e-05	0.00190212	yes
SRRM4	12:119419299-119600856	0.529038	1.76432	1.73767	0.194142	5e-05	0.00190212	yes
COL26A1	7:101006100-101202304	0.73573	2.46387	1.74368	0.410407	5e-05	0.00190212	yes
PAQR9	3:142680073-142682178	0.198422	0.667023	1.74916	0.398696	5e-05	0.00190212	yes
C2CD4A	15:62359175-62363116	0.193307	0.655277	1.76121	0.314031	5e-05	0.00190212	yes
TACC3	4:1723216-1746905	10.6758	36.3012	1.76568	0.111615	5e-05	0.00190212	yes
KLRC1	12:10594862-10607284	0.134079	0.457957	1.77213	0.249144	5e-05	0.00190212	yes
HIST1H2AB	6:26033319-26033796	0.249673	0.855559	1.77683	0.230613	5e-05	0.00190212	yes
FMO1	1:171217609-171255117	0.217316	0.751491	1.78996	0.285836	5e-05	0.00190212	yes
ST8SIA2	15:92937116-93011958	0.249067	0.876672	1.8155	0.513741	5e-05	0.00190212	yes
ABCA9	17:66970772-67057136	0.285511	1.00968	1.82228	0.317129	5e-05	0.00190212	yes
EBF2	8:25699245-25902640	0.299054	1.07792	1.84978	0.411845	5e-05	0.00190212	yes
MSMP	9:35749276-35754274	14.7947	54.0144	1.86826	0.130031	5e-05	0.00190212	yes
LBX1	10:102986732-102988717	0.138333	0.516605	1.90092	0.307685	5e-05	0.00190212	yes
TNMD	X:99839789-99854882	0.564961	2.13286	1.91657	0.337148	5e-05	0.00190212	yes
AGAP2	12:58118075-58135944	10.8827	41.2455	1.9222	0.384884	5e-05	0.00190212	yes
PM20D1	1:205797149-205819276	0.0832986	0.31827	1.93389	0.260994	5e-05	0.00190212	yes
SHH	7:155592677-155604967	0.680368	2.61453	1.94216	0.349169	5e-05	0.00190212	yes
PDGFRA	4:55095255-55164414	19.1295	76.8504	2.00625	0.200193	5e-05	0.00190212	yes
MC4R	18:58038563-58040001	0.105622	0.434566	2.04067	0.256293	5e-05	0.00190212	yes
CILP	15:65488336-65503840	0.332474	1.38611	2.05973	0.285321	5e-05	0.00190212	yes
PLPPR3	19:812487-821952	1.04	4.36617	2.06978	0.6145	5e-05	0.00190212	yes
BMP5	6:55618450-55740388	0.282779	1.20584	2.0923	0.447471	5e-05	0.00190212	yes
KANK4	1:62701836-62785085	0.149962	0.640156	2.09383	0.333003	5e-05	0.00190212	yes
MATN4	20:43922085-43946464	0.188658	0.814158	2.10954	0.449673	5e-05	0.00190212	yes
HIST1H3C	6:26045638-26046097	0.494782	2.14714	2.11755	0.300441	5e-05	0.00190212	yes
MMP12	11:102733459-102745764	0.379261	1.65437	2.12502	0.300142	5e-05	0.00190212	yes
PLAC1	X:133699872-133898352	0.161204	0.71438	2.14781	0.382234	5e-05	0.00190212	yes
DCAF12L2	X:125297481-125300080	0.107437	0.483269	2.16934	0.348798	5e-05	0.00190212	yes
CRABP1	15:78632665-78640572	6.30205	28.7196	2.18814	0.254814	5e-05	0.00190212	yes
SHISA2	13:26618734-26625198	0.28335	1.30022	2.1981	0.461089	5e-05	0.00190212	yes
GPC3	X:132669775-133119673	1.72058	7.94774	2.20765	0.439227	5e-05	0.00190212	yes
COL24A1	1:86194915-86622719	0.156679	0.727668	2.21546	0.34078	5e-05	0.00190212	yes
FABP4	8:82390731-82395473	0.887683	4.22402	2.2505	0.373783	5e-05	0.00190212	yes
ALX1	12:85674035-85695561	0.0963949	0.459202	2.2521	0.256538	5e-05	0.00190212	yes
NTRK1	1:156776034-156851642	0.730984	3.57006	2.28804	0.367778	5e-05	0.00190212	yes
EDN3	20:57875481-57901047	2.13108	10.5807	2.31177	0.313053	5e-05	0.00190212	yes
FRG2DP	16:34711784-34714967	0.126158	0.632232	2.32523	0.287695	5e-05	0.00190212	yes
LOC283387	12:58263617-58290265	0.177989	0.920122	2.37004	0.520897	5e-05	0.00190212	yes
SLC18A3	10:50817140-50873150	0.21439	1.11473	2.37839	0.503901	5e-05	0.00190212	yes
PERM1	1:910578-917497	0.0630422	0.337459	2.42032	0.3544	5e-05	0.00190212	yes
OBP2A	9:138437984-138441815	0.0973178	0.521829	2.4228	0.314857	5e-05	0.00190212	yes
PRAME	22:22890117-22909004	1.09849	6.17051	2.48987	0.273029	5e-05	0.00190212	yes
CYP24A1	20:52769987-52790516	0.123852	0.698145	2.49491	0.353853	5e-05	0.00190212	yes
COL2A1	12:48366747-48398285	0.249653	1.43511	2.52316	0.35434	5e-05	0.00190212	yes
OCA2	15:28000020-28344458	0.0709918	0.408419	2.52433	0.3884	5e-05	0.00190212	yes
HIST1H2BI	6:26273203-26273640	0.179747	1.0417	2.5349	0.279025	5e-05	0.00190212	yes
BARX1	9:96713908-96717608	0.515722	3.01764	2.54875	0.523173	5e-05	0.00190212	yes
TNNT3	11:1940798-1959936	0.0643906	0.379742	2.5601	0.254136	5e-05	0.00190212	yes
SIX2	2:45232323-45236542	0.293604	1.79888	2.61516	0.5026	5e-05	0.00190212	yes
PAX1	20:21686296-21699124	0.0826728	0.5116	2.62953	0.422815	5e-05	0.00190212	yes
IGF2	11:2150341-2182439	7.07108	44.0864	2.64033	0.115701	5e-05	0.00190212	yes
EBF3	10:131633495-131762091	0.229175	1.42919	2.64068	0.568093	5e-05	0.00190212	yes
LOC286178	8:58658707-58662756	0.328667	2.06972	2.65474	0.677416	5e-05	0.00190212	yes
HES2	1:6475293-6479979	0.0486023	0.315558	2.69881	0.387354	5e-05	0.00190212	yes
HMGA2	12:66151799-66360071	0.707631	4.76411	2.75114	0.42474	5e-05	0.00190212	yes
H19	11:2012325-2022696	26.6339	188.18	2.82077	0.322338	5e-05	0.00190212	yes
KCCAT333	7:17414540-17598533	0.0529379	0.37503	2.82463	0.359583	5e-05	0.00190212	yes
SCARA5	8:27727398-27850369	0.119688	0.93762	2.96972	0.449505	5e-05	0.00190212	yes
IGF2-AS	11:2150341-2182439	0.0879641	0.695012	2.98205	0.00914882	5e-05	0.00190212	yes
AVIL	12:58176527-58209852	2.63821	21.1159	3.0007	0.1234	5e-05	0.00190212	yes
TMPRSS2	21:42836477-42880085	0.135349	1.09174	3.01187	0.397483	5e-05	0.00190212	yes
HIST1H2BB	6:26043454-26043885	0.145091	1.17051	3.01211	0.420233	5e-05	0.00190212	yes
NPS	10:129347612-129350935	0.0887452	0.740461	3.06068	0.376235	5e-05	0.00190212	yes
FEV	2:219845808-219850379	0.176223	1.58563	3.16959	0.630512	5e-05	0.00190212	yes
IL31RA	5:55147206-55218682	0.086927	0.78273	3.17064	0.33639	5e-05	0.00190212	yes
DNM3OS	1:171810617-172387603	0.200788	1.82173	3.18156	0.418308	5e-05	0.00190212	yes
LINC01139	1:238643683-238649317	0.146359	1.63217	3.47921	0.612213	5e-05	0.00190212	yes
IGF2BP1	17:47074773-47133507	0.0451835	0.51425	3.5086	0.462136	5e-05	0.00190212	yes
SLC38A4	12:47158543-47219780	0.0986678	1.12464	3.51074	0.43923	5e-05	0.00190212	yes
LINC00626	1:168756178-168762126	0.0500173	0.59087	3.56234	0.369843	5e-05	0.00190212	yes
KERA	12:91444270-91452131	0.0243716	0.335937	3.78492	0.389987	5e-05	0.00190212	yes
TRIM48	11:55029657-55038595	0.0467436	0.648273	3.79376	0.336465	5e-05	0.00190212	yes
LOC440173	9:89623365-89657041	0.0263755	0.3706	3.81259	0.465047	5e-05	0.00190212	yes
LINC01602	8:58890916-58896685	0.0456797	0.666496	3.86697	0.336503	5e-05	0.00190212	yes
DLK1	14:101193201-101204561	0.253385	6.18168	4.6086	0.428885	5e-05	0.00190212	yes
RHBG	1:156338979-156355013	0.1065	2.94921	4.79141	0.497906	5e-05	0.00190212	yes
MAGEC2	X:141290127-141293076	0.0206202	0.597724	4.85735	0.582967	5e-05	0.00190212	yes
CAPN6	X:110488326-110513774	0.204223	6.18008	4.91941	0.525727	5e-05	0.00190212	yes
PRL	6:22287472-22303082	0.0260783	0.883385	5.08212	0.571396	5e-05	0.00190212	yes
LOC100130075	12:69198216-69199274	0.0379697	1.31124	5.10994	0.575472	5e-05	0.00190212	yes
PAEP	9:138453601-138458622	0.0259896	0.946525	5.18663	0.539038	5e-05	0.00190212	yes
MEOX1	17:41717757-41739262	0.0289402	1.32604	5.5179	0.805255	5e-05	0.00190212	yes
PDCL2	4:56422691-56458379	0.0088774	0.564855	5.9916	0.463582	5e-05	0.00190212	yes

## Sheet: female INO-1 vs 2_sign-gene_exp
Gene expression analysis of INO-1 and INO-2 female GBM subgroups. Differential expression between INO-1 and INO-2 editing-based subgroups was tested with CuffDiff2 software version 2.2.1.
gene_id	gene	locus	sample_1	sample_2	status	value_1 FPKM (mean)	value_2 FPKM (mean)	log2 INO2/INO1 (fold_change)	test-stat	p-value	q-value	significant
SEPT14	-	7:55861236-55930482	INO_1-F	INO_2-F	OK	13.3545	0.0516044	-8.01562	-1.39524	5e-05	0.00480057	yes
LINC01445	-	7:54398389-54417538	INO_1-F	INO_2-F	OK	102.125	1.15633	-6.46464	-1.07626	5e-05	0.00480057	yes
LOC100996654	-	7:54827005-54872656	INO_1-F	INO_2-F	OK	37.8758	0.579837	-6.02948	-1.15479	5e-05	0.00480057	yes
MMP13	-	11:102813720-102826463	INO_1-F	INO_2-F	OK	15.5727	0.450523	-5.11128	-0.849063	5e-05	0.00480057	yes
CXCL13	-	4:78432906-78532988	INO_1-F	INO_2-F	OK	16.6718	0.691706	-4.59111	-0.943847	5e-05	0.00480057	yes
COMP	-	19:18893582-18902114	INO_1-F	INO_2-F	OK	2.57295	0.111586	-4.5272	-0.761645	5e-05	0.00480057	yes
RARRES1	-	3:158414896-158450275	INO_1-F	INO_2-F	OK	45.6163	3.04691	-3.90413	-0.803113	5e-05	0.00480057	yes
CCL13	-	17:32683470-32685629	INO_1-F	INO_2-F	OK	1.78004	0.143894	-3.62883	-0.647963	5e-05	0.00480057	yes
C5orf46	-	5:147272270-147286101	INO_1-F	INO_2-F	OK	2.81796	0.248805	-3.50156	-0.662475	5e-05	0.00480057	yes
C11orf88	-	11:111385509-111407756	INO_1-F	INO_2-F	OK	3.94561	0.360257	-3.45315	-0.648935	5e-05	0.00480057	yes
DPT	-	1:168664694-168698442	INO_1-F	INO_2-F	OK	2.94974	0.270209	-3.44844	-0.599901	5e-05	0.00480057	yes
CCL18	-	17:34391631-34398841	INO_1-F	INO_2-F	OK	56.7648	5.23887	-3.43767	-0.643942	5e-05	0.00480057	yes
TRDN	-	6:123537483-123958238	INO_1-F	INO_2-F	OK	0.607434	0.0586883	-3.37158	-0.541184	5e-05	0.00480057	yes
CAPSL	-	5:35904397-35938881	INO_1-F	INO_2-F	OK	1.53898	0.151472	-3.34486	-0.641418	0.00015	0.0116806	yes
HAS1	-	19:52216364-52227245	INO_1-F	INO_2-F	OK	1.85549	0.221287	-3.06781	-0.705041	5e-05	0.00480057	yes
FAM92B	-	16:85131957-85146114	INO_1-F	INO_2-F	OK	0.490154	0.0630211	-2.95933	-0.501538	5e-05	0.00480057	yes
EFCAB1	-	8:49627473-49647870	INO_1-F	INO_2-F	OK	3.40169	0.453004	-2.90865	-0.768934	5e-05	0.00480057	yes
IGFL3	-	19:46623327-46627931	INO_1-F	INO_2-F	OK	0.690623	0.103022	-2.74494	-0.463499	0.0001	0.00857767	yes
DAO	-	12:109273856-109294710	INO_1-F	INO_2-F	OK	0.618512	0.0955668	-2.69422	-0.403043	5e-05	0.00480057	yes
CCL23	-	17:34340095-34345005	INO_1-F	INO_2-F	OK	0.735106	0.114227	-2.68605	-0.402001	0.0009	0.0478245	yes
LINC01532	-	19:29493461-29504862	INO_1-F	INO_2-F	OK	0.913505	0.146219	-2.64328	-0.558068	5e-05	0.00480057	yes
TMEM190	-	19:55888193-55889614	INO_1-F	INO_2-F	OK	0.749007	0.131383	-2.5112	-0.359045	0.0001	0.00857767	yes
CFAP100	-	3:126113781-126155398	INO_1-F	INO_2-F	OK	0.826634	0.146972	-2.4917	-0.595982	0.0001	0.00857767	yes
PCK1	-	20:56136136-56141513	INO_1-F	INO_2-F	OK	0.618487	0.112938	-2.45321	-0.420043	5e-05	0.00480057	yes
IDO1	-	8:39771327-39786309	INO_1-F	INO_2-F	OK	2.26331	0.423004	-2.41969	-0.656447	0.00035	0.0230128	yes
CD70	-	19:6581656-6591163	INO_1-F	INO_2-F	OK	6.61299	1.26021	-2.39164	-0.609959	0.0001	0.00857767	yes
NECTIN4	-	1:161040780-161059385	INO_1-F	INO_2-F	OK	0.411334	0.0797797	-2.36622	-0.553463	0.0001	0.00857767	yes
CCDC129	-	7:31553684-31698334	INO_1-F	INO_2-F	OK	0.571387	0.111651	-2.35548	-0.476451	5e-05	0.00480057	yes
EREG	-	4:75230859-75254477	INO_1-F	INO_2-F	OK	1.33813	0.264061	-2.34128	-0.557329	0.0004	0.0255064	yes
RETN	-	19:7733971-7735340	INO_1-F	INO_2-F	OK	2.63493	0.527012	-2.32185	-0.563263	0.00025	0.01775	yes
MAPK15	-	8:144798506-144804633	INO_1-F	INO_2-F	OK	1.03812	0.211093	-2.29801	-0.566943	0.0001	0.00857767	yes
AKAP14	-	X:119029935-119054679	INO_1-F	INO_2-F	OK	1.60359	0.328502	-2.28733	-0.424071	5e-05	0.00480057	yes
FAM81B	-	5:94727047-94786144	INO_1-F	INO_2-F	OK	1.06476	0.221549	-2.26484	-0.481151	0.0006	0.0353268	yes
MFAP5	-	12:8798538-8815484	INO_1-F	INO_2-F	OK	1.61342	0.336073	-2.26328	-0.593814	5e-05	0.00480057	yes
PHOSPHO1	-	17:47300731-47308128	INO_1-F	INO_2-F	OK	2.70621	0.570983	-2.24476	-0.581642	0.0001	0.00857767	yes
CHIT1	-	1:203185206-203198860	INO_1-F	INO_2-F	OK	6.51584	1.40493	-2.21346	-0.720375	0.0003	0.0199583	yes
DNAI1	-	9:34458749-34520987	INO_1-F	INO_2-F	OK	0.394902	0.0877155	-2.17059	-0.530763	5e-05	0.00480057	yes
MCEMP1	-	19:7741942-7744719	INO_1-F	INO_2-F	OK	1.86183	0.41647	-2.16044	-0.492111	0.0003	0.0199583	yes
OTOR	-	20:16728997-16732809	INO_1-F	INO_2-F	OK	0.599899	0.134522	-2.15688	-0.302729	5e-05	0.00480057	yes
C1orf158	-	1:12806133-12821102	INO_1-F	INO_2-F	OK	2.92402	0.664163	-2.13834	-0.530183	0.0002	0.0150875	yes
MS4A6E	-	11:60102354-60108441	INO_1-F	INO_2-F	OK	0.787699	0.182059	-2.11324	-0.262085	0.0001	0.00857767	yes
VIT	-	2:36923832-37041937	INO_1-F	INO_2-F	OK	0.537483	0.127594	-2.07466	-0.421094	5e-05	0.00480057	yes
COL21A1	-	6:55921387-56258926	INO_1-F	INO_2-F	OK	1.83743	0.437183	-2.07138	-0.660381	5e-05	0.00480057	yes
NRIR	-	2:6968684-6980595	INO_1-F	INO_2-F	OK	0.420875	0.100917	-2.06023	-0.407263	0.00095	0.0498543	yes
LINC00707	-	10:6821559-6884868	INO_1-F	INO_2-F	OK	0.689434	0.169056	-2.02791	-0.426391	5e-05	0.00480057	yes
MORN5	-	9:124922186-124962367	INO_1-F	INO_2-F	OK	8.81617	2.20502	-1.99936	-0.645228	5e-05	0.00480057	yes
CAMP	-	3:48264836-48266981	INO_1-F	INO_2-F	OK	3.76678	0.959798	-1.97253	-0.428182	0.00095	0.0498543	yes
PHKG1	-	7:56131916-56160689	INO_1-F	INO_2-F	OK	52.0928	13.3955	-1.95933	-0.278525	0.00075	0.0416891	yes
LAMA3	-	18:21269406-21535029	INO_1-F	INO_2-F	OK	0.660818	0.171598	-1.94522	-0.637849	5e-05	0.00480057	yes
ZBP1	-	20:56178901-56195632	INO_1-F	INO_2-F	OK	0.739947	0.195395	-1.92103	-0.509721	5e-05	0.00480057	yes
TMEM270	-	7:73275488-73280223	INO_1-F	INO_2-F	OK	0.519005	0.139571	-1.89475	-0.22293	0.0003	0.0199583	yes
SPINK2	-	4:57676025-57688035	INO_1-F	INO_2-F	OK	1.15222	0.314632	-1.87268	-0.397804	0.00045	0.028268	yes
LOC101928841	-	13:114053924-114068708	INO_1-F	INO_2-F	OK	0.446102	0.121921	-1.87142	-0.446566	0.0007	0.0398269	yes
NKX1-2	-	10:126133807-126138550	INO_1-F	INO_2-F	OK	0.401093	0.109754	-1.86967	-0.379522	0.0006	0.0353268	yes
CHRNA1	-	2:175612322-175629200	INO_1-F	INO_2-F	OK	16.2244	4.44409	-1.8682	-0.465726	0.00075	0.0416891	yes
TCF23	-	2:27371944-27375819	INO_1-F	INO_2-F	OK	0.458636	0.126128	-1.86246	-0.311553	0.00075	0.0416891	yes
DYDC2	-	10:82095860-82127829	INO_1-F	INO_2-F	OK	0.475874	0.133019	-1.83895	-0.36869	0.0008	0.0437489	yes
C1orf189	-	1:154171561-154178841	INO_1-F	INO_2-F	OK	1.24978	0.350212	-1.83537	-0.360283	0.0008	0.0437489	yes
LINC00836	-	10:25940640-26021864	INO_1-F	INO_2-F	OK	1.94872	0.554727	-1.81268	-0.47141	5e-05	0.00480057	yes
CLEC10A	-	17:6977855-6983626	INO_1-F	INO_2-F	OK	1.53431	0.438607	-1.80659	-0.494901	0.00015	0.0116806	yes
C9orf135	-	9:72435720-72521151	INO_1-F	INO_2-F	OK	0.87255	0.251252	-1.7961	-0.410195	0.00025	0.01775	yes
LTF	-	3:46477495-46526724	INO_1-F	INO_2-F	OK	574.642	166.67	-1.78567	-0.237512	5e-05	0.00480057	yes
RARRES2	-	7:150035406-150038763	INO_1-F	INO_2-F	OK	166	48.291	-1.78136	-1.1308	5e-05	0.00480057	yes
VSTM1	-	19:54544079-54567207	INO_1-F	INO_2-F	OK	1.49593	0.435498	-1.7803	-0.400478	0.0005	0.0309487	yes
ROPN1L	-	5:10441973-10465138	INO_1-F	INO_2-F	OK	2.95192	0.864905	-1.77104	-0.491168	0.00075	0.0416891	yes
VSTM2A	-	7:54610017-54639419	INO_1-F	INO_2-F	OK	21.3511	6.27773	-1.766	-0.330293	5e-05	0.00480057	yes
CARTPT	-	5:71014989-71016875	INO_1-F	INO_2-F	OK	0.659103	0.194018	-1.76431	-0.306926	0.0006	0.0353268	yes
MLPH	-	2:238395052-238463961	INO_1-F	INO_2-F	OK	0.487636	0.149489	-1.70576	-0.46664	0.0001	0.00857767	yes
ETV7	-	6:36321997-36355577	INO_1-F	INO_2-F	OK	3.32455	1.03735	-1.68025	-0.572215	5e-05	0.00480057	yes
MAP3K19	-	2:135722060-135782248	INO_1-F	INO_2-F	OK	0.678068	0.212254	-1.67564	-0.401491	0.0001	0.00857767	yes
NTS	-	12:86268072-86276770	INO_1-F	INO_2-F	OK	0.588045	0.185982	-1.66077	-0.218268	0.0007	0.0398269	yes
RARRES3	-	11:63304272-63313930	INO_1-F	INO_2-F	OK	183.041	59.1009	-1.63092	-0.808809	0.00015	0.0116806	yes
PGAM2	-	7:44102325-44105186	INO_1-F	INO_2-F	OK	64.4041	20.908	-1.62309	-0.877606	5e-05	0.00480057	yes
RSAD2	-	2:7017795-7038363	INO_1-F	INO_2-F	OK	10.6191	3.4612	-1.61732	-0.874671	5e-05	0.00480057	yes
GBP3	-	1:89472359-89488549	INO_1-F	INO_2-F	OK	20.1504	6.80417	-1.56632	-1.0011	0.00055	0.0334313	yes
CHCHD2	-	7:56169254-56174323	INO_1-F	INO_2-F	OK	1352.45	467.687	-1.53196	-0.356352	0.00095	0.0498543	yes
CFB	-	6_ssto_hap7:3246430-3252571	INO_1-F	INO_2-F	OK	18.2761	6.32394	-1.53106	-0.847755	5e-05	0.00480057	yes
SPATA18	-	4:52917496-52963471	INO_1-F	INO_2-F	OK	1.8247	0.635112	-1.52258	-0.640678	0.0009	0.0478245	yes
FOLR1	-	11:71900601-71907367	INO_1-F	INO_2-F	OK	9.59134	3.40004	-1.49618	-0.62229	0.00025	0.01775	yes
IL1R1	-	2:102686835-102796334	INO_1-F	INO_2-F	OK	6.70112	2.38015	-1.49335	-0.784991	0.00025	0.01775	yes
GBP1	-	1:89517986-89531043	INO_1-F	INO_2-F	OK	43.9896	16.1334	-1.44711	-0.835798	0.00025	0.01775	yes
ISG15	-	1:948846-949919	INO_1-F	INO_2-F	OK	245.207	90.852	-1.43241	-0.762383	0.0004	0.0255064	yes
RANBP3L	-	5:36247020-36302011	INO_1-F	INO_2-F	OK	6.80396	2.56434	-1.40779	-0.878542	5e-05	0.00480057	yes
DDIT4L	-	4:101107026-101136662	INO_1-F	INO_2-F	OK	15.1862	5.74792	-1.40165	-0.788551	5e-05	0.00480057	yes
IFITM1	-	11:313990-315272	INO_1-F	INO_2-F	OK	156.496	59.6709	-1.39103	-0.864713	0.0001	0.00857767	yes
S100A4	-	1:153516094-153524245	INO_1-F	INO_2-F	OK	144.856	58.5696	-1.3064	-0.8124	5e-05	0.00480057	yes
PIFO	-	1:111889181-111895639	INO_1-F	INO_2-F	OK	19.6333	8.05385	-1.28555	-0.783986	0.00015	0.0116806	yes
ITGB4	-	17:73717407-73753899	INO_1-F	INO_2-F	OK	41.8682	17.2986	-1.2752	-0.81487	0.0002	0.0150875	yes
MT1E	-	16:56659584-56661024	INO_1-F	INO_2-F	OK	404.213	167.142	-1.27404	-0.941386	5e-05	0.00480057	yes
SCUBE2	-	11:9041046-9113154	INO_1-F	INO_2-F	OK	11.594	4.81039	-1.26916	-0.407926	5e-05	0.00480057	yes
EGFR	-	7:55086713-55275773	INO_1-F	INO_2-F	OK	171.982	73.8113	-1.22034	-0.19285	0.0004	0.0255064	yes
PSMB9	-	6_ssto_hap7:4252710-4258398	INO_1-F	INO_2-F	OK	86.1076	37.2039	-1.21069	-0.873504	5e-05	0.00480057	yes
IFI44L	-	1:79086066-79111830	INO_1-F	INO_2-F	OK	16.3604	7.13783	-1.19665	-0.754819	0.0003	0.0199583	yes
IFI35	-	17:41158741-41166476	INO_1-F	INO_2-F	OK	49.7849	22.4089	-1.15164	-0.89022	5e-05	0.00480057	yes
S100A6	-	1:153507075-153508717	INO_1-F	INO_2-F	OK	1625.72	746.879	-1.12213	-0.608401	0.0005	0.0309487	yes
VAMP5	-	2:85811530-85820511	INO_1-F	INO_2-F	OK	181.658	85.0824	-1.09429	-0.811278	5e-05	0.00480057	yes
KRIT1	-	7:91828282-91875414	INO_1-F	INO_2-F	OK	16.4413	7.74929	-1.08519	-0.329348	5e-05	0.00480057	yes
HNMT	-	2:138721807-138773934	INO_1-F	INO_2-F	OK	32.7433	16.2596	-1.00991	-0.629947	5e-05	0.00480057	yes
IRF1	-	5:131817300-131826465	INO_1-F	INO_2-F	OK	15.0642	7.66092	-0.975539	-0.693711	0.00015	0.0116806	yes
C1QTNF5	-	11:119209643-119217383	INO_1-F	INO_2-F	OK	69.3856	35.6695	-0.959944	-0.735837	0.00025	0.01775	yes
DPYD	-	1:97543299-98386615	INO_1-F	INO_2-F	OK	24.0818	12.7442	-0.918102	-0.655425	0.0003	0.0199583	yes
HLA-DMA	-	6_ssto_hap7:4347146-4351658	INO_1-F	INO_2-F	OK	109.876	58.2523	-0.915493	-0.679697	0.00025	0.01775	yes
DHRS3	-	1:12627938-12677737	INO_1-F	INO_2-F	OK	74.7402	39.7194	-0.91204	-0.708156	0.0006	0.0353268	yes
PARP10	-	8:145051319-145060639	INO_1-F	INO_2-F	OK	20.9027	11.146	-0.90716	-0.667737	0.00025	0.01775	yes
AGTRAP	-	1:11796141-11810828	INO_1-F	INO_2-F	OK	71.525	38.1728	-0.905904	-0.715454	0.0002	0.0150875	yes
CTSH	-	15:79214091-79237440	INO_1-F	INO_2-F	OK	76.6404	41.0161	-0.901915	-0.686162	0.00055	0.0334313	yes
HSPB6	-	19:36245466-36247930	INO_1-F	INO_2-F	OK	78.2531	42.0396	-0.896398	-0.662728	0.0006	0.0353268	yes
TRIM22	-	11:5710816-5732093	INO_1-F	INO_2-F	OK	29.1163	15.8341	-0.878792	-0.639179	0.00075	0.0416891	yes
POLE4	-	2:75185769-75196859	INO_1-F	INO_2-F	OK	94.0975	51.5393	-0.868482	-0.649633	0.00075	0.0416891	yes
IFIT2	-	10:91061705-91069033	INO_1-F	INO_2-F	OK	10.1143	5.68061	-0.832273	-0.607042	0.0005	0.0309487	yes
TTC3	-	21:38445483-38575419	INO_1-F	INO_2-F	OK	15.8094	27.7361	0.810988	0.656646	0.0008	0.0437489	yes
C3orf70	-	3:184794625-184870836	INO_1-F	INO_2-F	OK	5.4252	9.83275	0.857919	0.648212	0.00085	0.0458891	yes
ETS1	-	11:128328655-128457453	INO_1-F	INO_2-F	OK	8.96172	16.3738	0.869539	0.769569	0.00085	0.0458891	yes
SHC3	-	9:91620685-91793682	INO_1-F	INO_2-F	OK	2.95609	5.46551	0.886663	0.655648	0.0003	0.0199583	yes
LINC01000	-	7:128281294-128301052	INO_1-F	INO_2-F	OK	3.89993	7.27731	0.899956	0.667784	0.00045	0.028268	yes
KLF12	-	13:74260148-74708066	INO_1-F	INO_2-F	OK	1.73604	3.24082	0.900557	0.670896	0.00045	0.028268	yes
PEG3	-	19:57276689-57352097	INO_1-F	INO_2-F	OK	3.53706	6.82045	0.947314	0.70382	0.0007	0.0398269	yes
CDK5R1	-	17:30814104-30818271	INO_1-F	INO_2-F	OK	5.81868	11.2649	0.953068	0.671544	0.0001	0.00857767	yes
NECTIN1	-	11:119508807-119599435	INO_1-F	INO_2-F	OK	4.11093	8.29666	1.01306	0.656545	0.00015	0.0116806	yes
ZNF704	-	8:81540685-81787016	INO_1-F	INO_2-F	OK	1.78969	3.67718	1.03889	0.787864	0.00025	0.01775	yes
C11orf95	-	11:63527363-63536113	INO_1-F	INO_2-F	OK	4.81314	10.3091	1.09886	0.795829	5e-05	0.00480057	yes
AFAP1L2	-	10:116054582-116164537	INO_1-F	INO_2-F	OK	4.17049	8.98474	1.10726	0.705367	0.0006	0.0353268	yes
SOGA1	-	20:35405844-35492087	INO_1-F	INO_2-F	OK	5.3289	11.5047	1.11031	0.787686	5e-05	0.00480057	yes
ADAMTS3	-	4:73146685-73434516	INO_1-F	INO_2-F	OK	1.04577	2.27084	1.11867	0.563215	5e-05	0.00480057	yes
ST18	-	8:53023391-53322439	INO_1-F	INO_2-F	OK	0.507123	1.10177	1.11941	0.426359	0.0003	0.0199583	yes
RPS6KL1	-	14:75370656-75389145	INO_1-F	INO_2-F	OK	1.12127	2.45511	1.13066	0.620477	0.00055	0.0334313	yes
PLAGL1	-	6:144261436-144385736	INO_1-F	INO_2-F	OK	2.02223	4.4546	1.13935	0.490111	5e-05	0.00480057	yes
GRIA2	-	4:158141735-158287226	INO_1-F	INO_2-F	OK	5.7268	12.9411	1.17616	0.813909	0.00065	0.0377447	yes
POSTN	-	13:38136718-38172981	INO_1-F	INO_2-F	OK	45.4102	102.692	1.17723	0.273395	0.0003	0.0199583	yes
SPRY4	-	5:141689991-141704620	INO_1-F	INO_2-F	OK	12.5425	28.7477	1.19662	0.763532	0.00065	0.0377447	yes
WASF1	-	6:110421021-110501207	INO_1-F	INO_2-F	OK	8.21272	18.9563	1.20674	0.790071	0.00015	0.0116806	yes
RAB33A	-	X:129305772-129318844	INO_1-F	INO_2-F	OK	6.16269	14.4499	1.22943	0.631852	5e-05	0.00480057	yes
RBFOX2	-	22:36134780-36424585	INO_1-F	INO_2-F	OK	6.78297	16.1162	1.24852	0.933604	5e-05	0.00480057	yes
PPP1R16B	-	20:37434335-37551667	INO_1-F	INO_2-F	OK	1.77335	4.23258	1.25506	0.705886	0.0009	0.0478245	yes
MAST1	-	19:12949258-12985766	INO_1-F	INO_2-F	OK	2.44359	5.91661	1.27577	0.724192	0.0004	0.0255064	yes
MMP16	-	8:89049459-89339717	INO_1-F	INO_2-F	OK	1.86911	4.57266	1.29068	0.752097	0.0003	0.0199583	yes
LNX1	-	4:54326436-54457753	INO_1-F	INO_2-F	OK	1.94735	4.82488	1.30898	0.707664	0.0008	0.0437489	yes
CBX2	-	17:77751976-77761449	INO_1-F	INO_2-F	OK	1.86014	4.6846	1.33252	0.68717	5e-05	0.00480057	yes
CCND1	-	11:69455872-69469242	INO_1-F	INO_2-F	OK	13.1666	33.1742	1.33318	0.846451	5e-05	0.00480057	yes
NOL4L	-	20:31030861-31172875	INO_1-F	INO_2-F	OK	2.72008	6.87776	1.33829	0.841103	0.00015	0.0116806	yes
MPPED2	-	11:30406039-30607930	INO_1-F	INO_2-F	OK	3.06172	7.75854	1.34144	0.727033	0.00025	0.01775	yes
ERBB3	-	12:56473808-56497291	INO_1-F	INO_2-F	OK	2.43562	6.19984	1.34794	0.555606	0.0001	0.00857767	yes
UNC13A	-	19:17712136-17799008	INO_1-F	INO_2-F	OK	1.3266	3.41608	1.36461	0.727317	0.00035	0.0230128	yes
SEPT6	-	X:118749687-118827333	INO_1-F	INO_2-F	OK	5.6694	14.6151	1.36619	0.721568	0.00015	0.0116806	yes
MEX3A	-	1:156041803-156051789	INO_1-F	INO_2-F	OK	4.10416	10.5844	1.36679	0.731627	0.0003	0.0199583	yes
HUNK	-	21:33245627-33376377	INO_1-F	INO_2-F	OK	0.725306	1.89051	1.38211	0.726776	5e-05	0.00480057	yes
NKX2-2	-	20:21491659-21494664	INO_1-F	INO_2-F	OK	6.56394	17.1384	1.3846	0.787652	5e-05	0.00480057	yes
OS9	-	12:58087737-58115340	INO_1-F	INO_2-F	OK	117.01	305.657	1.38529	0.374754	5e-05	0.00480057	yes
ELAVL4	-	1:50513685-50669457	INO_1-F	INO_2-F	OK	1.90812	5.03602	1.40014	0.765949	5e-05	0.00480057	yes
DTX3	-	12:57998404-58003587	INO_1-F	INO_2-F	OK	42.9372	113.654	1.40435	0.672449	5e-05	0.00480057	yes
ZFPM2	-	8:106331146-107072731	INO_1-F	INO_2-F	OK	1.54036	4.12652	1.42166	0.719391	0.0004	0.0255064	yes
SAPCD2	-	9:139956578-139965028	INO_1-F	INO_2-F	OK	4.39553	11.7957	1.42415	0.76712	0.0001	0.00857767	yes
BACH2	-	6:90636246-91006627	INO_1-F	INO_2-F	OK	0.572392	1.54809	1.43541	0.775423	0.00015	0.0116806	yes
PCDH15	-	10:55562530-57387702	INO_1-F	INO_2-F	OK	0.665724	1.80689	1.44051	0.533126	0.00025	0.01775	yes
XYLT1	-	16:17196180-17564738	INO_1-F	INO_2-F	OK	1.72841	4.71836	1.44884	0.746716	0.0003	0.0199583	yes
CHGB	-	20:5891973-5906005	INO_1-F	INO_2-F	OK	3.76089	10.3003	1.45354	0.807908	5e-05	0.00480057	yes
STEAP1B	-	7:22459062-22539901	INO_1-F	INO_2-F	OK	1.03347	2.83183	1.45424	0.494368	0.00085	0.0458891	yes
PTCH1	-	9:98205261-98279339	INO_1-F	INO_2-F	OK	2.80318	7.95688	1.50514	0.743574	0.0001	0.00857767	yes
IGF2BP3	-	7:23349827-23509995	INO_1-F	INO_2-F	OK	3.14179	8.99633	1.51775	0.801316	5e-05	0.00480057	yes
SLC1A1	-	9:4490426-4587469	INO_1-F	INO_2-F	OK	2.91165	8.42524	1.53288	0.854639	5e-05	0.00480057	yes
FOXF2	-	6:1390068-1395832	INO_1-F	INO_2-F	OK	4.66774	13.5101	1.53324	0.784952	5e-05	0.00480057	yes
FGFR3	-	4:1795038-1810599	INO_1-F	INO_2-F	OK	23.146	68.4396	1.56407	0.20599	5e-05	0.00480057	yes
LOC101927751	-	15:101419896-101613094	INO_1-F	INO_2-F	OK	0.258863	0.765634	1.56446	0.110327	0.0004	0.0255064	yes
GPC2	-	7:99767228-99775049	INO_1-F	INO_2-F	OK	3.40679	10.1969	1.58164	0.861198	5e-05	0.00480057	yes
KCP	-	7:128516918-128550773	INO_1-F	INO_2-F	OK	0.157193	0.479752	1.60975	0.420411	0.00065	0.0377447	yes
SEZ6L	-	22:26565439-26779563	INO_1-F	INO_2-F	OK	5.6051	17.237	1.6207	1.0117	0.00015	0.0116806	yes
CENPV	-	17:16245847-16256812	INO_1-F	INO_2-F	OK	14.1356	43.7286	1.62925	0.886682	5e-05	0.00480057	yes
STK26	-	X:131157244-131209971	INO_1-F	INO_2-F	OK	0.608673	1.92876	1.66394	0.579904	0.00055	0.0334313	yes
RNF212	-	4:1065265-1107352	INO_1-F	INO_2-F	OK	0.235139	0.748022	1.66957	0.325579	0.00085	0.0458891	yes
CACNG5	-	17:64873390-64881395	INO_1-F	INO_2-F	OK	0.254381	0.811269	1.67319	0.282973	0.0005	0.0309487	yes
CELSR3	-	3:48673895-48700348	INO_1-F	INO_2-F	OK	0.85298	2.74793	1.68776	0.949079	5e-05	0.00480057	yes
COL25A1	-	4:109731876-110223799	INO_1-F	INO_2-F	OK	0.356301	1.15428	1.69583	0.534083	0.0003	0.0199583	yes
LRRN2	-	1:204586302-204654597	INO_1-F	INO_2-F	OK	15.4485	50.739	1.71563	0.231032	5e-05	0.00480057	yes
SLC8A3	-	14:70510933-70699300	INO_1-F	INO_2-F	OK	1.29796	4.26441	1.7161	0.752301	0.0003	0.0199583	yes
RAMP2-AS1	-	17:40905946-40915060	INO_1-F	INO_2-F	OK	0.527747	1.7373	1.71893	0.363322	0.0003	0.0199583	yes
DNAH14	-	1:225117355-225586996	INO_1-F	INO_2-F	OK	0.216249	0.715228	1.72571	0.339839	5e-05	0.00480057	yes
OPCML	-	11:132284558-133402507	INO_1-F	INO_2-F	OK	1.49942	5.00589	1.73923	1.00434	0.00045	0.028268	yes
AKR1E2	-	10:4868368-4890251	INO_1-F	INO_2-F	OK	0.176195	0.595783	1.75761	0.420187	5e-05	0.00480057	yes
L1CAM	-	X:153126968-153154427	INO_1-F	INO_2-F	OK	1.5727	5.38368	1.77535	1.04229	5e-05	0.00480057	yes
SOX11	-	2:5832798-5841517	INO_1-F	INO_2-F	OK	3.90276	13.3613	1.77549	0.917505	5e-05	0.00480057	yes
MIR4697HG	-	11:133766329-133771635	INO_1-F	INO_2-F	OK	2.65452	9.30926	1.81022	0.97381	5e-05	0.00480057	yes
ARMC4	-	10:28101092-28287979	INO_1-F	INO_2-F	OK	0.387419	1.3622	1.81398	0.478251	0.0001	0.00857767	yes
CELF5	-	19:3224700-3297073	INO_1-F	INO_2-F	OK	1.32943	4.80109	1.85255	0.752276	0.00025	0.01775	yes
TMEM132B	-	12:125811161-126146923	INO_1-F	INO_2-F	OK	1.41507	5.15734	1.86575	1.14318	5e-05	0.00480057	yes
SCUBE3	-	6:35181838-35220856	INO_1-F	INO_2-F	OK	0.132097	0.483035	1.87053	0.644894	0.00075	0.0416891	yes
INHBC	-	12:57828467-57845845	INO_1-F	INO_2-F	OK	0.0981643	0.360009	1.87476	0.413188	0.0009	0.0478245	yes
MEG3	-	14:101292444-101327360	INO_1-F	INO_2-F	OK	13.6608	50.131	1.87566	0.742129	5e-05	0.00480057	yes
SLC6A15	-	12:85253266-85306608	INO_1-F	INO_2-F	OK	0.382329	1.4413	1.91448	0.648247	0.00015	0.0116806	yes
DACT2	-	6:168693509-168720434	INO_1-F	INO_2-F	OK	0.262457	1.01491	1.95119	0.582232	0.0001	0.00857767	yes
TNMD	-	X:99839789-99854882	INO_1-F	INO_2-F	OK	0.894168	3.4621	1.95303	0.463019	0.0007	0.0398269	yes
ELAVL2	-	9:23690102-23850638	INO_1-F	INO_2-F	OK	0.696027	2.70871	1.96039	0.84358	5e-05	0.00480057	yes
B4GALNT1	-	12:58012187-58027022	INO_1-F	INO_2-F	OK	7.84359	31.06	1.98547	0.731298	0.0002	0.0150875	yes
RSPO3	-	6:127440047-127520626	INO_1-F	INO_2-F	OK	0.108965	0.433383	1.99177	0.467933	0.0006	0.0353268	yes
ESR2	-	14:64693429-64805268	INO_1-F	INO_2-F	OK	0.33397	1.34136	2.00591	0.520958	5e-05	0.00480057	yes
MIMT1	-	19:57352269-57359922	INO_1-F	INO_2-F	OK	0.144779	0.5817	2.00642	0.494979	0.0007	0.0398269	yes
DUSP9	-	X:152907896-152916781	INO_1-F	INO_2-F	OK	0.351186	1.41366	2.00913	0.555193	0.0008	0.0437489	yes
COLEC11	-	2:3642421-3692234	INO_1-F	INO_2-F	OK	0.851213	3.43745	2.01375	0.625152	5e-05	0.00480057	yes
ADGRG2	-	X:19007424-19140755	INO_1-F	INO_2-F	OK	0.13133	0.535857	2.02865	0.517653	0.0001	0.00857766	yes
CENPVL3	-	X:51359873-51361770	INO_1-F	INO_2-F	OK	0.105832	0.435648	2.04139	0.421103	0.0002	0.0150875	yes
IGLON5	-	19:51815101-51834122	INO_1-F	INO_2-F	OK	2.60658	10.951	2.07083	1.11653	5e-05	0.00480057	yes
NXPH1	-	7:8473584-8792593	INO_1-F	INO_2-F	OK	3.02315	12.7238	2.07341	1.11624	5e-05	0.00480057	yes
H19	-	11:2012325-2022696	INO_1-F	INO_2-F	OK	39.442	167.089	2.08281	0.315762	5e-05	0.00480057	yes
FOXD2	-	1:47846467-47906363	INO_1-F	INO_2-F	OK	0.260153	1.10868	2.09141	0.461176	0.00095	0.0498543	yes
NTRK1	-	1:156776034-156851642	INO_1-F	INO_2-F	OK	1.23215	5.39145	2.12949	0.435826	5e-05	0.00480057	yes
PLPPR1	-	9:103791030-104087417	INO_1-F	INO_2-F	OK	4.8533	21.41	2.14125	1.23789	5e-05	0.00480057	yes
SLC26A10	-	12:58012187-58027022	INO_1-F	INO_2-F	OK	1.10824	4.94538	2.15781	0.349974	0.0009	0.0478245	yes
LGR5	-	12:71833549-71980088	INO_1-F	INO_2-F	OK	0.497402	2.28948	2.20254	0.737393	0.00055	0.0334313	yes
ADRA2B	-	2:96778622-96781984	INO_1-F	INO_2-F	OK	0.30567	1.45491	2.25088	0.583366	0.0004	0.0255064	yes
MDM4	-	1:204485506-204527248	INO_1-F	INO_2-F	OK	3.93603	18.7997	2.2559	0.541631	5e-05	0.00480057	yes
SLC17A6	-	11:22359666-22401046	INO_1-F	INO_2-F	OK	0.114105	0.545488	2.25718	0.558262	0.0003	0.0199583	yes
LINC02488	-	5:86957858-86975226	INO_1-F	INO_2-F	OK	0.126556	0.60662	2.26101	0.45354	5e-05	0.00480057	yes
SALL4	-	20:50399255-50419062	INO_1-F	INO_2-F	OK	0.248943	1.19515	2.2633	0.579093	5e-05	0.00480057	yes
SHH	-	7:155592677-155604967	INO_1-F	INO_2-F	OK	0.955487	4.60771	2.26974	0.496843	5e-05	0.00480057	yes
FGF10	-	5:44305096-44388784	INO_1-F	INO_2-F	OK	0.160181	0.784811	2.29264	0.402279	0.0002	0.0150875	yes
CHRNA4	-	20:61974661-62002529	INO_1-F	INO_2-F	OK	0.251237	1.24522	2.30927	0.820213	0.00015	0.0116806	yes
HOXA11-AS	-	7:27225026-27228912	INO_1-F	INO_2-F	OK	0.276512	1.39612	2.33601	0.51665	5e-05	0.00480057	yes
GABRQ	-	X:151806636-151821825	INO_1-F	INO_2-F	OK	0.775182	3.94402	2.34706	0.586291	0.00025	0.01775	yes
NPY5R	-	4:164264998-164273086	INO_1-F	INO_2-F	OK	0.0781539	0.40384	2.3694	0.427059	0.00015	0.0116806	yes
LOC105379252	-	9:69381811-69481677	INO_1-F	INO_2-F	OK	0.42624	2.23678	2.39169	0.686726	0.0004	0.0255064	yes
CRABP2	-	1:156669399-156675608	INO_1-F	INO_2-F	OK	10.1276	53.2633	2.39486	0.59384	5e-05	0.00480057	yes
MATN4	-	20:43922085-43946464	INO_1-F	INO_2-F	OK	0.185863	0.979423	2.39769	0.620477	5e-05	0.00480057	yes
TERT	-	5:1253286-1295162	INO_1-F	INO_2-F	OK	0.120776	0.641643	2.40944	0.668418	5e-05	0.00480057	yes
FCRLA	-	1:161676761-161684142	INO_1-F	INO_2-F	OK	0.332703	1.76956	2.41108	0.646883	5e-05	0.00480057	yes
PAK5	-	20:9518036-9819687	INO_1-F	INO_2-F	OK	0.207386	1.10922	2.41916	0.770757	0.0006	0.0353268	yes
CSMD3	-	8:113235158-114449242	INO_1-F	INO_2-F	OK	0.0643977	0.350517	2.4444	0.785813	0.00025	0.01775	yes
MKX	-	10:27961802-28056728	INO_1-F	INO_2-F	OK	0.414038	2.26205	2.4498	0.699985	5e-05	0.00480057	yes
PIK3C2B	-	1:204391757-204459474	INO_1-F	INO_2-F	OK	1.98151	10.8725	2.45601	0.748122	5e-05	0.00480057	yes
GOLT1A	-	1:204167287-204183220	INO_1-F	INO_2-F	OK	1.07922	5.97939	2.47	0.552321	0.0001	0.00857767	yes
MUC4	-	3:195473637-195538844	INO_1-F	INO_2-F	OK	0.0723914	0.401979	2.47323	0.502393	5e-05	0.00480057	yes
RPS26	-	12:56435638-56438481	INO_1-F	INO_2-F	OK	6.17626	34.319	2.4742	0.647864	5e-05	0.00480057	yes
TRIM71	-	3:32859509-32939318	INO_1-F	INO_2-F	OK	0.0740107	0.414508	2.48559	0.710661	0.00035	0.0230128	yes
GFRA1	-	10:117816441-118033157	INO_1-F	INO_2-F	OK	0.360401	2.02825	2.49256	0.781522	0.0002	0.0150875	yes
COL11A2	-	6_ssto_hap7:4610635-4637414	INO_1-F	INO_2-F	OK	0.718448	4.17734	2.53963	0.707271	5e-05	0.00480057	yes
TSPAN8	-	12:71518876-71551779	INO_1-F	INO_2-F	OK	0.344938	2.03832	2.56297	0.582886	5e-05	0.00480057	yes
INHBE	-	12:57849073-57851796	INO_1-F	INO_2-F	OK	0.116991	0.698256	2.57736	0.63977	0.00015	0.0116806	yes
LINC00189	-	21:30565814-30660526	INO_1-F	INO_2-F	OK	0.0955823	0.576264	2.59191	0.435268	5e-05	0.00480057	yes
KCNK9	-	8:140613080-140715299	INO_1-F	INO_2-F	OK	0.264648	1.59589	2.59221	0.72159	5e-05	0.00480057	yes
CCBE1	-	18:57098170-57364644	INO_1-F	INO_2-F	OK	0.08985	0.542788	2.5948	0.486024	5e-05	0.00480057	yes
HOXA13	-	7:27236498-27239725	INO_1-F	INO_2-F	OK	0.355609	2.15419	2.59879	0.654409	5e-05	0.00480057	yes
DLX6	-	7:96597826-96643377	INO_1-F	INO_2-F	OK	0.26907	1.63754	2.60547	0.52214	0.0007	0.0398269	yes
DCX	-	X:110537006-110655460	INO_1-F	INO_2-F	OK	1.39578	8.66474	2.63408	1.50492	5e-05	0.00480057	yes
CYP27C1	-	2:127941411-127963343	INO_1-F	INO_2-F	OK	0.115858	0.720277	2.6362	0.738982	0.0006	0.0353268	yes
MEG9	-	14:101536247-101539273	INO_1-F	INO_2-F	OK	0.316831	2.00304	2.66041	0.806648	0.0003	0.0199583	yes
VGF	-	7:100805789-100808852	INO_1-F	INO_2-F	OK	19.4473	123.112	2.66233	0.525473	5e-05	0.00480057	yes
PLAC1	-	X:133699872-133898352	INO_1-F	INO_2-F	OK	0.160394	1.04006	2.69697	0.5945	5e-05	0.00480057	yes
NEUROD4	-	12:55413728-55423801	INO_1-F	INO_2-F	OK	0.066275	0.436217	2.71851	0.503067	5e-05	0.00480057	yes
SCGB3A2	-	5:147258273-147261756	INO_1-F	INO_2-F	OK	0.164824	1.08524	2.71901	0.442204	5e-05	0.00480057	yes
IGF2	-	11:2150341-2182439	INO_1-F	INO_2-F	OK	6.36342	42.6783	2.74563	0.3031	5e-05	0.00480057	yes
PDGFRA	-	4:55095255-55164414	INO_1-F	INO_2-F	OK	13.7771	93.324	2.75998	0.34334	5e-05	0.00480057	yes
TACC3	-	4:1723216-1746905	INO_1-F	INO_2-F	OK	11.5755	78.612	2.76367	0.303005	5e-05	0.00480057	yes
LBX1	-	10:102986732-102988717	INO_1-F	INO_2-F	OK	0.131159	0.90421	2.78534	0.557104	5e-05	0.00480057	yes
TMEM196	-	7:19758937-19812404	INO_1-F	INO_2-F	OK	0.134625	0.934009	2.79449	0.778797	0.00015	0.0116806	yes
ATP6V0A4	-	7:138391038-138490769	INO_1-F	INO_2-F	OK	0.0569392	0.403382	2.82465	0.497913	5e-05	0.00480057	yes
EDN3	-	20:57875481-57901047	INO_1-F	INO_2-F	OK	2.67617	18.9795	2.8262	0.555065	5e-05	0.00480057	yes
AGAP2	-	12:58118075-58135944	INO_1-F	INO_2-F	OK	5.0165	35.6845	2.83055	0.912657	5e-05	0.00480057	yes
SULT1C2	-	2:108905094-108926371	INO_1-F	INO_2-F	OK	0.130211	0.931175	2.83821	0.691444	5e-05	0.00480057	yes
SCUBE1	-	22:43599228-43739394	INO_1-F	INO_2-F	OK	0.0528799	0.379554	2.84351	0.616208	5e-05	0.00480057	yes
SLITRK1	-	13:84451339-84456528	INO_1-F	INO_2-F	OK	0.462878	3.36518	2.86198	1.16586	0.00015	0.0116806	yes
EBF2	-	8:25699245-25902640	INO_1-F	INO_2-F	OK	0.219722	1.61093	2.87415	0.77949	5e-05	0.00480057	yes
CA10	-	17:49707673-50237377	INO_1-F	INO_2-F	OK	1.48625	11.0839	2.89872	1.21236	0.00015	0.0116806	yes
KLRC1	-	12:10594862-10607284	INO_1-F	INO_2-F	OK	0.141341	1.0836	2.93858	0.605735	5e-05	0.00480057	yes
DMRT2	-	9:1050345-1057554	INO_1-F	INO_2-F	OK	0.279722	2.18718	2.967	0.827469	5e-05	0.00480057	yes
TLX1	-	10:102849077-102901023	INO_1-F	INO_2-F	OK	0.2037	1.67644	3.04088	0.649136	5e-05	0.00480057	yes
OR3A2	-	17:3181183-3182268	INO_1-F	INO_2-F	OK	0.0519183	0.427543	3.04176	0.497196	0.00015	0.0116806	yes
LINC02283	-	4:55199058-55222271	INO_1-F	INO_2-F	OK	1.24446	10.4124	3.0647	0.782975	5e-05	0.00480057	yes
COL24A1	-	1:86194915-86622719	INO_1-F	INO_2-F	OK	0.210284	1.76311	3.06771	0.726362	5e-05	0.00480057	yes
BARX1	-	9:96713908-96717608	INO_1-F	INO_2-F	OK	0.586937	5.1059	3.12089	0.748212	5e-05	0.00480057	yes
SCRT2	-	20:642239-656823	INO_1-F	INO_2-F	OK	0.256148	2.27953	3.15368	0.926181	0.0001	0.00857767	yes
PRKG2	-	4:82008523-82136271	INO_1-F	INO_2-F	OK	0.0452488	0.403352	3.15609	0.638654	5e-05	0.00480057	yes
TRIM67	-	1:231298673-231357314	INO_1-F	INO_2-F	OK	0.083194	0.77346	3.21677	1.06305	0.00015	0.0116806	yes
OR4N2	-	14:20271928-20296531	INO_1-F	INO_2-F	OK	0.103579	0.991229	3.25848	0.609937	5e-05	0.00480057	yes
SOSTDC1	-	7:16501105-16505474	INO_1-F	INO_2-F	OK	0.308574	2.97507	3.26924	0.824112	5e-05	0.00480057	yes
LOC286178	-	8:58658707-58662756	INO_1-F	INO_2-F	OK	0.267351	2.60499	3.28447	0.945042	5e-05	0.00480057	yes
FEV	-	2:219845808-219850379	INO_1-F	INO_2-F	OK	0.0943694	0.927375	3.29676	0.730964	5e-05	0.00480057	yes
CRABP1	-	15:78632665-78640572	INO_1-F	INO_2-F	OK	5.64774	57.0375	3.33616	0.549814	5e-05	0.00480057	yes
GABRR1	-	6:89887222-89941007	INO_1-F	INO_2-F	OK	0.043585	0.450521	3.36969	0.620579	0.0001	0.00857767	yes
SIX2	-	2:45232323-45236542	INO_1-F	INO_2-F	OK	0.359307	3.80252	3.40367	0.835203	5e-05	0.00480057	yes
GPC3	-	X:132669775-133119673	INO_1-F	INO_2-F	OK	1.42358	15.3817	3.43362	0.904391	0.00065	0.0377447	yes
CYP27B1	-	12:58156116-58160976	INO_1-F	INO_2-F	OK	0.721868	7.83558	3.44023	1.05469	5e-05	0.00480057	yes
KCCAT333	-	7:17414540-17598533	INO_1-F	INO_2-F	OK	0.0714268	0.781389	3.4515	0.614516	5e-05	0.00480057	yes
RGS13	-	1:192605267-192629440	INO_1-F	INO_2-F	OK	0.0479331	0.524732	3.45249	0.684678	5e-05	0.00480057	yes
ARHGAP28	-	18:6834431-6915712	INO_1-F	INO_2-F	OK	0.181899	1.99714	3.45673	1.06184	5e-05	0.00480057	yes
IL31RA	-	5:55147206-55218682	INO_1-F	INO_2-F	OK	0.18607	2.10025	3.49665	0.623562	5e-05	0.00480057	yes
LINC01447	-	7:47661536-47669491	INO_1-F	INO_2-F	OK	0.0391173	0.451003	3.52726	0.703792	5e-05	0.00480057	yes
COL26A1	-	7:101006100-101202304	INO_1-F	INO_2-F	OK	0.37434	4.57025	3.60985	0.974284	5e-05	0.00480057	yes
LOC283387	-	12:58263617-58290265	INO_1-F	INO_2-F	OK	0.118967	1.50308	3.65929	1.0565	5e-05	0.00480057	yes
HMGA2	-	12:66151799-66360071	INO_1-F	INO_2-F	OK	0.939766	12.0533	3.68098	0.928252	5e-05	0.00480057	yes
PCDHA10	-	5:140165720-140391929	INO_1-F	INO_2-F	OK	0.180085	2.34953	3.70562	0.613882	5e-05	0.00480057	yes
DCAF12L2	-	X:125297481-125300080	INO_1-F	INO_2-F	OK	0.051815	0.688509	3.73203	0.748341	5e-05	0.00480057	yes
FAM163A	-	1:179696897-179785335	INO_1-F	INO_2-F	OK	0.0269934	0.381117	3.81956	0.392236	5e-05	0.00480057	yes
SHISA2	-	13:26618734-26625198	INO_1-F	INO_2-F	OK	0.167982	2.45526	3.8695	0.89763	5e-05	0.00480057	yes
C14orf39	-	14:60902673-60952764	INO_1-F	INO_2-F	OK	0.0276446	0.407576	3.882	0.478269	5e-05	0.00480057	yes
ERVH48-1	-	21:44337360-44345708	INO_1-F	INO_2-F	OK	0.027716	0.414298	3.90188	0.718408	5e-05	0.00480057	yes
PM20D1	-	1:205797149-205819276	INO_1-F	INO_2-F	OK	0.0534004	0.822636	3.94533	0.752378	5e-05	0.00480057	yes
KANK4	-	1:62701836-62785085	INO_1-F	INO_2-F	OK	0.104229	1.6353	3.97174	0.854536	5e-05	0.00480057	yes
ALX1	-	12:85674035-85695561	INO_1-F	INO_2-F	OK	0.0618475	1.01576	4.03771	0.684513	5e-05	0.00480057	yes
CYP24A1	-	20:52769987-52790516	INO_1-F	INO_2-F	OK	0.107707	1.81771	4.07693	0.896666	5e-05	0.00480057	yes
FRG2DP	-	16:34711784-34714967	INO_1-F	INO_2-F	OK	0.0265047	0.506796	4.25709	0.599768	5e-05	0.00480057	yes
PRSS48	-	4:152198324-152213014	INO_1-F	INO_2-F	OK	0.0194169	0.37403	4.26777	0.599227	5e-05	0.00480057	yes
MAGEC2	-	X:141290127-141293076	INO_1-F	INO_2-F	OK	0.020789	0.412554	4.31069	0.662322	5e-05	0.00480057	yes
DNM3OS	-	1:171810617-172387603	INO_1-F	INO_2-F	OK	0.219294	4.48036	4.35268	0.797829	5e-05	0.00480057	yes
OCA2	-	15:28000020-28344458	INO_1-F	INO_2-F	OK	0.051423	1.08641	4.40101	1.01164	5e-05	0.00480057	yes
IGF2BP1	-	17:47074773-47133507	INO_1-F	INO_2-F	OK	0.0534192	1.22269	4.51656	0.789779	5e-05	0.00480057	yes
LIN28B	-	6:105404922-105531207	INO_1-F	INO_2-F	OK	0.0237168	0.593205	4.64455	0.84181	5e-05	0.00480057	yes
COL2A1	-	12:48366747-48398285	INO_1-F	INO_2-F	OK	0.123204	3.22253	4.70907	0.978164	5e-05	0.00480057	yes
AVIL	-	12:58176527-58209852	INO_1-F	INO_2-F	OK	2.10152	55.7647	4.72984	0.359311	5e-05	0.00480057	yes
TMPRSS2	-	21:42836477-42880085	INO_1-F	INO_2-F	OK	0.100186	2.77286	4.79062	0.967829	5e-05	0.00480057	yes
LINC00377	-	13:81592525-81618577	INO_1-F	INO_2-F	OK	0.0240539	0.725571	4.91477	0.749665	5e-05	0.00480057	yes
LINC01139	-	1:238643683-238649317	INO_1-F	INO_2-F	OK	0.128811	4.25512	5.04588	1.24978	5e-05	0.00480057	yes
EBF3	-	10:131633495-131762091	INO_1-F	INO_2-F	OK	0.0765731	2.91218	5.24912	1.38245	5e-05	0.00480057	yes
LINC00626	-	1:168756178-168762126	INO_1-F	INO_2-F	OK	0.033938	1.69354	5.641	0.827794	5e-05	0.00480057	yes
CAPN6	-	X:110488326-110513774	INO_1-F	INO_2-F	OK	0.11344	6.18832	5.76955	1.07201	5e-05	0.00480057	yes
LOC440173	-	9:89623365-89657041	INO_1-F	INO_2-F	OK	0.0188237	1.06163	5.81758	1.02044	5e-05	0.00480057	yes
PAX1	-	20:21686296-21699124	INO_1-F	INO_2-F	OK	0.0194619	1.16772	5.9069	1.20384	5e-05	0.00480057	yes
DLK1	-	14:101193201-101204561	INO_1-F	INO_2-F	OK	0.241966	15.0029	5.9543	0.88627	5e-05	0.00480057	yes
RHBG	-	1:156338979-156355013	INO_1-F	INO_2-F	OK	0.129971	8.32309	6.00086	1.10221	5e-05	0.00480057	yes
MEOX1	-	17:41717757-41739262	INO_1-F	INO_2-F	OK	0.0317964	2.31596	6.18661	1.1937	5e-05	0.00480057	yes
PRAME	-	22:22890117-22909004	INO_1-F	INO_2-F	OK	0.144399	14.3701	6.63687	1.27492	5e-05	0.00480057	yes
LINC01602	-	8:58890916-58896685	INO_1-F	INO_2-F	OK	0.0151454	1.89465	6.96691	1.08805	5e-05	0.00480057	yes
LOC100129603	-	7:3180564-3198206	INO_1-F	INO_2-F	OK	0	0.484763	inf	-	5e-05	0.00480057	yes
MIR1244-1	-	2:232573234-232578250	INO_1-F	INO_2-F	OK	0	325.598	inf	-	5e-05	0.00480057	yes
OR7C2	-	19:15052300-15053260	INO_1-F	INO_2-F	OK	0.500953	0	#NAME?	-	5e-05	0.00480057	yes
